# Supplementary material
Source: publisher figshare collection journal article supplement (https://plos.figshare.com/articles/dataset/_/7086587)
Supplement: Supplementary file 1 [file 1]

Archive with 13 entries (13 files):
- ppat.1007288.s001.pdf
- ppat.1007288.s002.pdf
- ppat.1007288.s003.pdf
- ppat.1007288.s004.pdf
- ppat.1007288.s005.tif
- ppat.1007288.s006.tif
- ppat.1007288.s007.tif
- ppat.1007288.s008.tif
- ppat.1007288.s009.tif
- ppat.1007288.s010.tif
- ppat.1007288.s011.tif
- ppat.1007288.s012.tif
- ppat.1007288.s013.tif
