# Supplementary material
Source: publisher figshare collection journal article supplement (https://plos.figshare.com/articles/dataset/_/7086587)
Supplement: Supplementary file 1 [file 1 › ppat.1007288.s001.pdf]

**S1 Table.** *Pha13*-responsive differentially expressed genes (DEGs) compared to vector control are classified into NPR1-dependent and -independent groups following previous studies.

| ID <sup>a</sup>                    | Alias             | Description                                                                                                                                          | <i>Arabidopsis</i><br>Homolog <sup>b</sup> | P value <sup>c</sup> | Fold<br>changes <sup>c</sup> | References |
|------------------------------------|-------------------|------------------------------------------------------------------------------------------------------------------------------------------------------|--------------------------------------------|----------------------|------------------------------|------------|
| <b><i>NPR1-dependent genes</i></b> |                   |                                                                                                                                                      |                                            |                      |                              |            |
| PATC145800                         | WRKY70            | WRKY Transcription Factor                                                                                                                            | At3g56400                                  | 0.000010             | 14.11                        | [53]       |
| PATC152659                         | WRKY53            | WRKY Transcription Factor                                                                                                                            | At4g23810                                  | 0.000282             | 5.19                         | [53]       |
| PATC139697                         | Protein<br>kinase | Protein kinase superfamily protein                                                                                                                   | At3g09010                                  | 0.013400             | 1.63                         | [31]       |
| PATC148973                         | APK2b             | Protein kinase 2B                                                                                                                                    | At2g02800                                  | 0.014900             | 2.05                         | [31]       |
| PATC141782                         | YSL3              | YELLOW STRIPE like 3                                                                                                                                 | At5g53550                                  | 0.000426             | 3.11                         | [31]       |
| PATC135791                         | NPR1              | Key regulator of the salicylic acid (SA)-mediated systemic<br>acquired resistance (SAR) pathway.                                                     | At1g64280                                  | 0.014900             | 1.61                         |            |
| PATC154483                         |                   | LisH and RanBPM domain-containing protein                                                                                                            | AT1g61150                                  | 0.006653064          | 1.44                         | [53]       |
| PATC133682                         | LURP1             | A member of the LURP cluster which exhibits pronounced<br>upregulation after recognition of the pathogenic oomycete <i>H.</i><br><i>parasitica</i> . | AT2g14560                                  | 0.000362737          | 2.38                         | [53]       |
| PATC142626                         | CPFTSY            | Chloroplast SRP receptor homolog. Required for LHCP<br>integration into isolated thylakoids.                                                         | AT2g45770                                  | 0.04253212           | 1.38                         | [53]       |

**S1 Table. Cont.**

|                                      |        |                                                                                                                                              |           |             |       |      |
|--------------------------------------|--------|----------------------------------------------------------------------------------------------------------------------------------------------|-----------|-------------|-------|------|
| PATC154050                           |        | Encodes an aspartic protease, has an important regulatory function in chloroplasts.                                                          | AT3g12700 | 0.000322238 | 3.64  | [53] |
| PATC143146                           | RdR1   | RNA-dependent RNA polymerase                                                                                                                 | At1g14790 | 0.031000    | 1.38  |      |
| <b><i>NPR1-independent genes</i></b> |        |                                                                                                                                              |           |             |       |      |
| PATC152473                           | SSI2   | A stearyl-ACP desaturase, involved in fatty acid desaturation                                                                                | At2g43710 | 0.019400    | 1.34  | [54] |
| PATC125646                           | WRKY3  | WRKY DNA-binding protein 3                                                                                                                   | At2g03340 | 0.001050    | 2.03  | [55] |
| PATC129486                           | WRKY21 | WRKY DNA-binding protein 21                                                                                                                  | At2g30590 | 0.003180    | 1.57  | [55] |
| PATC154824                           | IEGT   | UDP-glucosyl transferase 73B1                                                                                                                | AT4g34138 | 0.000117    | 2.32  | [56] |
| PATC068819                           | GRXC9  | Encodes GRX480, a member of the glutaredoxin family that regulates protein redox state                                                       | At1g28480 | 0.000002    | 15.04 | [57] |
| PATC132182                           | GRXS13 | Glutaredoxin ATGRXS13, required to facilitate <i>Botrytis cinerea</i> infection of <i>Arabidopsis thaliana</i> plants.                       | At1g03850 | 0.006730    | 1.9   | [57] |
| PATC148347                           | ADH1   | Catalyzes the reduction of acetaldehyde using NADH as reductant                                                                              | At1g77120 | 0.002740    | 1.67  | [31] |
| PATC225126                           | DMR6   | DOWNY MILDEW RESISTANT 6. Encodes a putative 2OG-Fe(II) oxygenase that is defense-associated but required for susceptibility to downy mildew | At5g24530 | 0.015500    | 2.06  | [31] |

**S1 Table. Cont.**

|            |         |                                                                                                                                   |           |          |      |      |
|------------|---------|-----------------------------------------------------------------------------------------------------------------------------------|-----------|----------|------|------|
| PATC143725 | ASPG1   | Encodes an asparaginase that catalyzes the degradation of L-asparagine to L-aspartic acid and ammonia.                            | At3g16150 | 0.001380 | 3.23 | [53] |
| PATC139952 | ATAPR3  | A member of a multigene family within the thioredoxin (TRX) superfamily.                                                          | At4g21990 | 0.000346 | 3.47 | [31] |
| PATC156665 | ANAC002 | A member of the NAC family of transcription factors                                                                               | At1g01720 | 0.000008 | 6.48 | [31] |
| PATC127565 | AOX     | The alternative oxidase of plant mitochondria transfers electrons from the ubiquinone pool to oxygen without energy conservations | At3g22370 | 0.039800 | 1.25 | [53] |

<sup>a</sup>Accession number of Orchidstra database (<http://orchidstra.abrc.sinica.edu.tw>)

<sup>b</sup>Accession number of TAIR (<http://www.Arabidopsis.org>)

<sup>c</sup>All DEGs are selected based on significance (unpaired t test  $P < 0.05$ )
