# Supplementary material
Source: publisher figshare collection journal article supplement (https://plos.figshare.com/articles/dataset/_/7086587)
Supplement: Supplementary file 1 [file 1 › ppat.1007288.s002.pdf]

**S2 Table.** Pha13 interacting proteins identified by yeast-two-hybrid screening

| <b>ID<sup>a</sup></b> | <b>Alias</b>          | <b>Description</b>                                                                                                                                                                                   | <b><i>Arabidopsis</i><br/>Homolog<sup>b</sup></b> | <b>Number<br/>of clones</b> |
|-----------------------|-----------------------|------------------------------------------------------------------------------------------------------------------------------------------------------------------------------------------------------|---------------------------------------------------|-----------------------------|
| PATC155725            | UBQ10                 | One of five polyubiquitin genes in <i>A. thaliana</i>                                                                                                                                                | AT4G05320                                         | 20                          |
| PATC156673            | UBQ4                  | Encodes a ubiquitin polyprotein.                                                                                                                                                                     | AT5G20620                                         | 4                           |
| PATC233706            | UBQ13                 | Polyubiquitin gene                                                                                                                                                                                   | AT1G65350                                         | 1                           |
| PATC125694            | DNAJ homolog          | DNAJ heat shock family protein involved in protein folding                                                                                                                                           | AT2G20560                                         | 2                           |
| PATC143280            | Cytosolic thioredoxin | Encodes a cytosolic thioredoxin that reduces disulfide bridges of target proteins by the reversible formation of a disulfide bridge between two neighboring Cys residues present in the active site. | AT3G51030                                         | 2                           |
| PATC156413            | Cytosolic thioredoxin | Encodes a cytosolic thioredoxin that reduces disulfide bridges of target proteins by the reversible formation of a disulfide bridge between two neighboring Cys residues present in the active site. | AT3G51030                                         | 2                           |
| PATC154796            | A20/AN1 ZF            | A20/AN1-like zinc finger family protein; Function in DNA binding, zinc ion binding                                                                                                                   | AT2G36320                                         | 1                           |

**S2 Table. Cont.**

|            |                                      |                                                                                                                                                       |           |   |
|------------|--------------------------------------|-------------------------------------------------------------------------------------------------------------------------------------------------------|-----------|---|
| PATC146799 | FD3                                  | Ferredoxin 3 (FD3) involved in electron transport chain                                                                                               | AT2G27510 | 1 |
| PATC150760 | WD40 repeat-like protein             | Transducin/WD40 repeat-like superfamily protein                                                                                                       | AT4G18905 | 1 |
| PATC126521 | Dihydrolipoamide succinyltransferase | Dihydrolipoamide succinyltransferase; Function in zinc ion binding, acyltransferase activity.                                                         | AT4G26910 | 1 |
| PATC130336 | SLOMO F-Box                          | Encodes SLOMO (SLOW MOTION), an F-box protein required for auxin homeostasis and normal timing of lateral organ initiation at the shoot meristem.     | AT4G33210 | 1 |
| PATC146324 | TRAP                                 | Translocon-associated protein (TRAP), alpha subunit                                                                                                   | AT2G21160 | 1 |
| PATC147016 | DNAJ homolog                         | Homologous to the co-chaperon DNAJ protein from <i>E. coli</i>                                                                                        | AT3G44110 | 1 |
| PATC142935 | LOS1                                 | LOW EXPRESSION OF OSMOTICALLY RESPONSIVE GENES 1 encodes a translation elongation factor 2-like protein that is involved in cold-induced translation. | AT1G56070 | 1 |

**S2 Table. Cont.**

|            |                                   |                                                                                                                                                |           |   |
|------------|-----------------------------------|------------------------------------------------------------------------------------------------------------------------------------------------|-----------|---|
| PATC129205 | SWAP70                            | Pleckstrin homology (PH) domain-containing protein involved in signal transduction                                                             | AT2G30880 | 1 |
| PATC130549 | APT3                              | Adenine phosphoribosyl transferase 3                                                                                                           | AT4G22570 | 1 |
| PATC157121 | Alpha/beta hydrolase              | Involved in the lipid metabolic process                                                                                                        | AT3G14360 | 1 |
| PATC140414 | OB-fold like protein              | Nucleic acid-binding, OB-fold-like protein; Function in RNA binding, translation initiation factor activity                                    | AT2G04520 | 1 |
| PATC137737 | Copia-like retrotransposon family | Copia-like retrotransposon family                                                                                                              | AT1G31210 | 1 |
| PATC157709 | ELIP                              | Encodes an early light-inducible protein                                                                                                       | AT3G22840 | 1 |
| PATC155095 | SABATH methyltransferase          | A member of the <i>Arabidopsis</i> SABATH methyltransferase gene family.<br>Encodes NAMT1, a methyltransferase that methylates nicotinic acid. | AT5G04370 | 1 |

**S2 Table. Cont.**

|            |                                                        |                                                                                                                                                               |           |   |
|------------|--------------------------------------------------------|---------------------------------------------------------------------------------------------------------------------------------------------------------------|-----------|---|
| PATC155413 | EF1a, Tu family                                        | GTP binding elongation factor Tu family protein; Function in calmodulin binding, translation elongation factor activity; Involved in translational elongation | AT5G60390 | 1 |
| PATC131101 | HAD superfamily protein                                | Haloacid dehalogenase-like hydrolase (HAD) superfamily protein; Function in phosphatase activity                                                              | AT3G55960 | 1 |
| PATC140021 | Aldolase-type TIM barrel family protein                | Aldolase-type TIM barrel family protein                                                                                                                       | AT4G02610 | 1 |
| PATC157778 | RBP L18                                                | Encodes cytoplasmic ribosomal protein L18                                                                                                                     | AT3G05590 | 1 |
| PATC228024 | Peroxisomal catalase                                   | Loss of function mutations have increased H2O2 levels and increased H2O2 sensitivity.                                                                         | AT4G35090 | 1 |
| PATC126060 | Chloroplast-localized pentatricopeptide-repeat protein | Encodes a chloroplast-localized pentatricopeptide-repeat protein involved in regulation of nuclear gene expression.                                           | AT2G31400 | 1 |

**S2 Table. Cont.**

|            |                                                                       |                                                                                                                                                                     |           |   |
|------------|-----------------------------------------------------------------------|---------------------------------------------------------------------------------------------------------------------------------------------------------------------|-----------|---|
| PATC125551 | Mitochondrial substrate carrier family protein                        | Mitochondrial substrate carrier family protein; Functions in binding, transporter activity; Involved in transport, mitochondrial transport, transmembrane transport | AT3G55640 | 1 |
| PATC129335 | Serinc-domain containing serine and sphingolipid biosynthesis protein |                                                                                                                                                                     | AT1G16180 | 1 |

<sup>a</sup>Accession number of Orchidstra database (<http://orchidstra.abrc.sinica.edu.tw>)

<sup>b</sup>Accession number of TAIR (<http://www.Arabidopsis.org>)
