# Supplementary material
Source: publisher figshare collection journal article supplement (https://plos.figshare.com/articles/dataset/_/7086587)
Supplement: Supplementary file 1 [file 1 › ppat.1007288.s003.pdf]

**S3 Table.** Primers and probes used in this study

| Name of primers and probes      | Nucleotide sequence              | Description                                                                                                        |
|---------------------------------|----------------------------------|--------------------------------------------------------------------------------------------------------------------|
| <b>Semi-quantitative RT-PCR</b> |                                  |                                                                                                                    |
| CymMV-F                         | 5'-GAAATAATCATGGGAGAGCC-3'       | Detection of <i>Cymbidium mosaic virus</i> (CymMV)                                                                 |
| CymMV-R                         | 5'-AGTTTGGCGTTATTCAGTAGG-3'      |                                                                                                                    |
| ORSV-F                          | 5'-ACGCACAATCTGATCCGTA-3'        | Detection of <i>Odontoglossum ringspot virus</i> (ORSV)                                                            |
| ORSV-R                          | 5'-ATCCGCAGTGAAAACCC-3'          |                                                                                                                    |
| Pha13-F                         | 5'-TCATCTTAAAACAGAGCAGGATCTGA-3' | Detection of <i>Pha13</i> (PATC148746 <sup>a</sup> )                                                               |
| Pha13-R                         | 5'-ATTGGCCTGGACCACCGGGTT-3'      |                                                                                                                    |
| PhaRdR1-F                       | 5'-GCACGGGAGCTACGAAAGTCAA AT-3'  | Detection of <i>PhaRNA-dependent RNA polymerase 1</i> ( <i>PhaRdR1</i> ; PATC143146 <sup>a</sup> )                 |
| PhaRdR1-R                       | 5'-TTAATGGGCAGCTGCAAACAAATC-3'   |                                                                                                                    |
| PhaGRX-F                        | 5'-TCATTATCTTCTTCCTTCGGCGG-3'    | Detection of <i>PhaGlutaredoxin C9</i> ( <i>PhaGRX</i> ; PATC068819 <sup>a</sup> )                                 |
| PhaGRX-R                        | 5'-CTACAACCACAGAGCTCCAGCCTC-3'   |                                                                                                                    |
| PhaUBQ 10-F                     | 5'-TACCGGTAAGACTTTCAACCTCT-3'    | Detection of <i>PhaUbiquitin 10</i> ( <i>PhaUBQ10</i> ; PATC230548 <sup>a</sup> )                                  |
| PhaUBQ 10-R                     | 5'-AAGGCCAAAATTCAGGATAAAGAG-3'   |                                                                                                                    |
| PhaPR1-F                        | 5'-TGCGAGGCTGAATTAACAACGAA-3'    | Detection of <i>PhaPathogenesis-related protein 1</i> ( <i>PhaPR1</i> ; PATC126136 <sup>a</sup> )                  |
| PhaPR1-R                        | 5'-GCCAGGAACATTACCAGGAGGATA-3'   |                                                                                                                    |
| <b>Real-time RT-PCR</b>         |                                  |                                                                                                                    |
| Pha13-qF                        | 5'-TCATCTTAAAACAGAGCAGGATCTGA-3' | Detection of <i>Pha13</i>                                                                                          |
| Pha13-qR                        | 5'-CGGCGTCTAAAGAAGAGGAAGAG-3'    |                                                                                                                    |
| PhaNPR1-qF                      | 5'-AGTTGATGGCACCTTGGAGTTT-3'     | Detection of <i>PhaNonexpressor of pathogenesis-related protein 1</i> ( <i>PhaNPR1</i> ; PATC135791 <sup>a</sup> ) |
| PhaNPR1-qR                      | 5'-AAGAAGCGTTTCCCGAGTTCA-3'      |                                                                                                                    |
| PhaPR1-qF                       | 5'-GGATCATCGTCTTGCGATTT-3'       | Detection of <i>PhaPR1</i>                                                                                         |
| PhaPR1-qR                       | 5'-CCGCACAACGTGTACATGCAT-3'      |                                                                                                                    |
| CymMV-qF                        | 5'-TGATGCTGGCCACTAACGATC-3'      | Detection of CymMV                                                                                                 |
| CymMV-qR                        | 5'-GGAATCAACGGCATCGAAGA-3'       |                                                                                                                    |
| PhaRdR1-qF                      | 5'-TGACAAGTACAAGGATGGCG-3'       | Detection of <i>PhaRdR1</i>                                                                                        |
| PhaRdR1-qR                      | 5'-ACTCTTCACCCCATCAACATC-3'      |                                                                                                                    |
| PhaGRX-qF                       | 5'-ACGTCGTAAAGCATCTCCTT-3'       | Detection of <i>PhaGRX</i>                                                                                         |
| PhaGRX-qR                       | 5'-CGGTAAGGTCACCGTAAAAC-3'       |                                                                                                                    |

**S3 Table. Cont.**

|                            |                                                               |                                                                                                                               |
|----------------------------|---------------------------------------------------------------|-------------------------------------------------------------------------------------------------------------------------------|
| PhaUBQ 10-qF               | 5'-CCGGATCAGCAAAGGTTGA-3'                                     | Detection of <i>PhaUBQ10</i>                                                                                                  |
| PhaUBQ 10-qR               | 5'-AAGATTTGCATCCCTCCCC-3'                                     |                                                                                                                               |
| PhaJAZ1-qF                 | 5'-CTCGGAGTGGTTGGCTTTATTAG-3'                                 | Detection of <i>PhaJasmonate</i><br><i>ZIM-domain protein 1</i><br>( <i>PhaJAZ1</i> ; PATC141437 <sup>a</sup> )               |
| PhaJAZ1-qR                 | 5'-GTGATGCCTTCCTTGCGATT-3'                                    |                                                                                                                               |
| PhaACO2-qF                 | 5'-CGTCCAAAACGCTTGATTCC-3'                                    | Detection of<br><i>PhaAmino-cyclopropane-carbo</i><br><i>xylate oxidase 2</i> ( <i>PhaACO2</i> ;<br>PATC139319 <sup>a</sup> ) |
| PhaACO2-qR                 | 5'-GCGCAAATTCCTTCATGGTT-3'                                    |                                                                                                                               |
| AtACT-qF                   | 5'-GGCAAGTCATCACGATTGG -3'                                    | Detection of <i>AtActin</i><br>(At3G18780)                                                                                    |
| AtACT-qR                   | 5'-CAGCTTCCATTCCCACAAAC -3'                                   |                                                                                                                               |
| TRV-qF                     | 5'-CATGCTAACAAATTGCGAAAGC-3'                                  | Detection of TRV                                                                                                              |
| TRV-qR                     | 5'-CACAGACAAACCATCCACAATTATTTT-3'                             |                                                                                                                               |
| CMV-qF                     | 5'-TTCCTGCCTCCTCGGACTTA-3'                                    | Detection of CMV                                                                                                              |
| CMV-qR                     | 5'-GCTCCGTCGCGAACATA-3'                                       |                                                                                                                               |
| AtSAP5-qF                  | 5'-ACCAGCTAAAGTCGTGATTTCG-3'                                  | Detection of <i>AtSAP5</i>                                                                                                    |
| AtSAP5-qR                  | 5'-AGCGGTTTTGTAGTCGTAGC-3'                                    |                                                                                                                               |
| AtNPR1-qF                  | 5'-AGGAGATTGCCAAGGATTACG-3'                                   | Detection of <i>AtNPR1</i>                                                                                                    |
| AtNPR1-qR                  | 5'-ACGTCCAATAAGTGCCTCTG-3'                                    |                                                                                                                               |
| AtPR1-qF                   | 5'-ATCGTCTTTGTAGCTCTTGTAGG-3'                                 | Detection of <i>AtPR1</i>                                                                                                     |
| AtPR1-qR                   | 5'-AGGCTAAGTTTTCCCGTAAG-3'                                    |                                                                                                                               |
| AtRdR1-qF                  | 5'-AAGAGCGGTTTCGGGCGTTGA-3'                                   | Detection of <i>AtRdR1</i>                                                                                                    |
| AtRdR1-qR                  | 5'-AGCCGAAGCCTTTGCTGACTCA-3'                                  |                                                                                                                               |
| AtGRXC9-qF                 | 5'-AGAGAGTTCGGATGGTGGTG-3'                                    | Detection of <i>AtGRXC9</i>                                                                                                   |
| AtGRXC9-qR                 | 5'-CACTCCAAGTCCAAGAAGCAG-3'                                   |                                                                                                                               |
| Construction               |                                                               |                                                                                                                               |
| attB1-Pha13-F <sup>b</sup> | 5'-GGGGACAAGTTTGTACAAAAAAGCAGG<br>CTCGTGGAGAAATCCCTCATGGCT-3' | Construction of<br>pCymMV-Pha13-virus induced<br>gene silencing vector                                                        |
| attB2-Pha13-R <sup>b</sup> | 5'-GGGGACCACTTTGTACAAGAAAGCTGG<br>GTTCAAATCTTCCGCAGCTTATCG-3' |                                                                                                                               |
| Pha13-hpRNA-F              | 5'-CACCCCGGTCCAACCCGGTGGTCCA-3'                               | Construction of phpPha13                                                                                                      |
| Pha13-hpRNA-R              | 5'-TGGACCACCGGGTTGGACCGG-3'                                   |                                                                                                                               |
| PhaNPR1-hpRNA-F            | 5' -CACCCGAGATCATTGATTCCTTCCC-3'                              | Construction of phpPhaNPR1                                                                                                    |
| PhaNPR1-hpRNA-R            | 5' -GGGAAGGAATCAATGATCTCG-3'                                  |                                                                                                                               |

**S3 Table. Cont.**

|                            |                                                                             |                                                                                    |
|----------------------------|-----------------------------------------------------------------------------|------------------------------------------------------------------------------------|
| PhaRdR1-hpRNA-F            | 5'-CACCGCCTATCACTGCGTCACATGT-3'                                             | Construction of phpPhaRdR1                                                         |
| PhaRdR1-hpRNA-R            | 5'-ACATGTGACGCAGTGATAGGC-3'                                                 |                                                                                    |
| PhaGRX-hpRNA-F             | 5'-CACCGCTAATGGCGGCGCATATTAC-3'                                             | Construction of phpPhaGRX                                                          |
| PhaGRX-hpRNA-R             | 5'-GTAATATGCGCCGCCATTAGC-3'                                                 |                                                                                    |
| Pha13-ORF-F                | 5'-CACCATGGCGGAAGAACGGAGATG-3'                                              | Construction of<br>pG-Pha13 or pPha13-G                                            |
| Pha13-ORF-<br>NONSTOP-R    | 5'-AATCTTCCGCAGCTTATCGGCC-3'                                                |                                                                                    |
| FLAG-Pha13ORF-F            | 5'-CACCATGGATTACAAGGATGACGACG<br>ATAAGATGGCGGAAGAACG-3'                     | Construction of pPha13-oe and<br>pHPha13                                           |
| Pha13ORF-R                 | 5'-TCAAATCTTCCGCAGCTTATCGG-3'                                               |                                                                                    |
| AtSAP5-RNAi-F              | 5'- CACCCGCAGGTGTTGTTGAATCAGG-3'                                            | Construction of<br>phpAtSAP5-RNAi                                                  |
| AtSAP5-RNAi-R              | 5'- GATCTGTTGATCTCTCTTCTT-3'                                                |                                                                                    |
| AtSAP5ORF-F                | 5'- CACCATGGCTCAGAGAACGGAGAAG-3'                                            | Construction of pAtSAP5-oe                                                         |
| AtSAP5ORF-HA-R             | 5'-TCAAGCGTAATCTGGAACATCGTATGGGTA<br>AACTTTGACCATTTTCGCAGC-3'               |                                                                                    |
| Pha13A20m-F                | 5'-GCAACCCTAAACCTCGGCTCGAGCGGCT<br>ACCGCGATCATC -3'                         | Construction of pPha13A20m                                                         |
| Pha13A20m-R                | 5'-GATGATCGCGGTAGCCGCTCGAGCCGAG<br>GTTTAGGGTTGC-3'                          |                                                                                    |
| Pha13AN1m-F                | 5'-CTGACCGGGTTCAAGGGCCGTTGCGGAT<br>CGACGTACTGTGGGGCCGCGGTACCCGGA<br>GCA-3'  | Construction of pPha13AN1m                                                         |
| Pha13AN1m-R                | 5'-TGCTCCGGGTACCGGCCGCCCCACAGTA<br>CGTCGATCCGCAACGGCCCTTGAACCCGGTCA<br>G-3' |                                                                                    |
| NdeI-Pha13-F <sup>c</sup>  | 5'-TTCTCATATGGCGGAAGAACGGAGATGC<br>CAA-3'                                   | Construction of pETPha13,<br>pETPha13A20m,<br>pETPha13AN1m and<br>pETPha13A20mAN1m |
| NotI-Pha13-R <sup>c</sup>  | 5'-ATATGCGGCCGCAATCTTCCGCAG-3'                                              |                                                                                    |
| NdeI-Pha13-F <sup>c</sup>  | 5'-AGAGCATATGGCTGCCACCTTCTCCTCCT<br>TTT-3'                                  | Construction of pGBKPha13                                                          |
| EcoRI-Pha13-R <sup>c</sup> | 5'-AGAGGAATTCAAATCTTCCGCAGCTTA-3'                                           |                                                                                    |

**S3 Table. Cont.**

|                             |                                                     |                                                               |
|-----------------------------|-----------------------------------------------------|---------------------------------------------------------------|
| Nd13Fs412F <sup>c</sup>     | 5'-CTAAC <u>CATATG</u> CGGGATTGCGATTGCC-3'          |                                                               |
| Nd13Ap361F <sup>c</sup>     | 5'-CTAAC <u>CATATG</u> CACCGGTACCCGGAG-3'           |                                                               |
| Nd13Sg247F <sup>c</sup>     | 5'-CTAAC <u>CATATG</u> CCGGCGGTGCGCCGAT-3'          | For construction of Pha13 with N-terminus deletions into pGBK |
| Nd13Bt136F <sup>c</sup>     | 5'-CTAAC <u>CATATG</u> TGGAGAAATCCCTC-3'            |                                                               |
| Nd13Ps88F <sup>c</sup>      | 5'-CTAAC <u>CATATG</u> TCGAGCTGCTACCGC-3'           |                                                               |
| EcoR1-Pha13-R <sup>c</sup>  | 5'-AGAGGAATTCAAATCTCCGCAGCTTA-3'                    |                                                               |
| Nd13A20F <sup>c</sup>       | 5'-CTAAC <u>CATATG</u> CAAGAAGGTATGCGA-3'           | For construction of A20                                       |
| BH13A20R <sup>c</sup>       | 5'-CTAAGGATCCAAGATGATCGCGGTA-3'                     | domain into pGBK                                              |
| Nd13AN1F <sup>c</sup>       | 5'-CTAAC <u>CATATG</u> GAGAGGCCGAGAAGG-3'           | For construction of AN1                                       |
| BH13AN1R <sup>c</sup>       | 5'-CTAAGGATCCCTTATAGTCGAAATC-3'                     | domain into pGBK                                              |
| NdeI-PhaUBQ-F <sup>c</sup>  | 5'-CTCT <u>CATATG</u> AGGGGAGGTATGCAGATTT<br>TCG-3' | Construction of polyubiquitin (PATC203893)                    |
| BamHI-PhaUBQ-R <sup>c</sup> | 5'-CTATGGATCCACCACGAAGACGGAGCACA<br>A-3'            |                                                               |
| NdeI-AtSAP5-F <sup>c</sup>  | 5'-TTCT <u>CATATG</u> TGGCTCAGAGAACGGAGA<br>AG-3'   | Construction of pETAtSAP5                                     |
| XhoI-AtSAP5-R <sup>c</sup>  | 5'-AGAGCTCGAGAACTTTGACCATTTTCGCA<br>GC-3'           |                                                               |

<sup>a</sup>Accession number of Orchidstra database (<http://orchidstra.abrc.sinica.edu.tw>)

<sup>b</sup>Underlined sequences indicate the attB sequences. The 4 G at the 5' end were added as recommended by the manufacturer.

<sup>c</sup>Underlined sequences indicate the sequence recognized by restriction enzyme. The random 4 nucleotides at the 5' end were added as recommended by the manufacture
