# Supplementary material
Source: publisher figshare collection journal article supplement (https://plos.figshare.com/articles/dataset/_/7086587)
Supplement: Supplementary file 1 [file 1 › ppat.1007288.s004.pdf]

## **The sequence of Pha13 coding region**

Pha13 (PATC148746)

ATGGCGGAAGAACGGAGATGCCAAGAAGGTATGCGATGCGCGAACAAC  
TGC GGTTTCTTCGGCAGCCCTGCAACCCTAAACCTCTGCTCGAGCTGCTACC  
GCGATCATCTTAAACAGAGCAGGATCTGATCGCCGTGGAGAAATCCCTC  
ATGGCTGCCACCTTCTCCTCCTCCTCCTCCTCCTCCTCCTCCTTTAGACG  
CCGTGCTTTCTCCTCTCCTCCCTTCTCCGCCGCCGCGTGTGCACCGGCGG  
TCGCCGATGAGCCGGCGGAGGAGCGGCCGAGAAGGTGCATGGCTTGCCG  
GAAAAAGGTGGGGCTGACAGGGTTCAAGTGCCGTTGCGGATCGACGTTCT  
GTGGGGCCCACCGGTACCCGGAGCATCACGCCTGCGATTTGACTATAAG  
TCGGCCGGCCGGGATTGATTGCCCGGTCCAACCCGGTGGTCCAGGCCGA  
TAAGCTGCGGAAGATTTGA
