# Supplementary material
Source: publisher figshare collection journal article supplement (https://plos.figshare.com/articles/dataset/_/7086587)

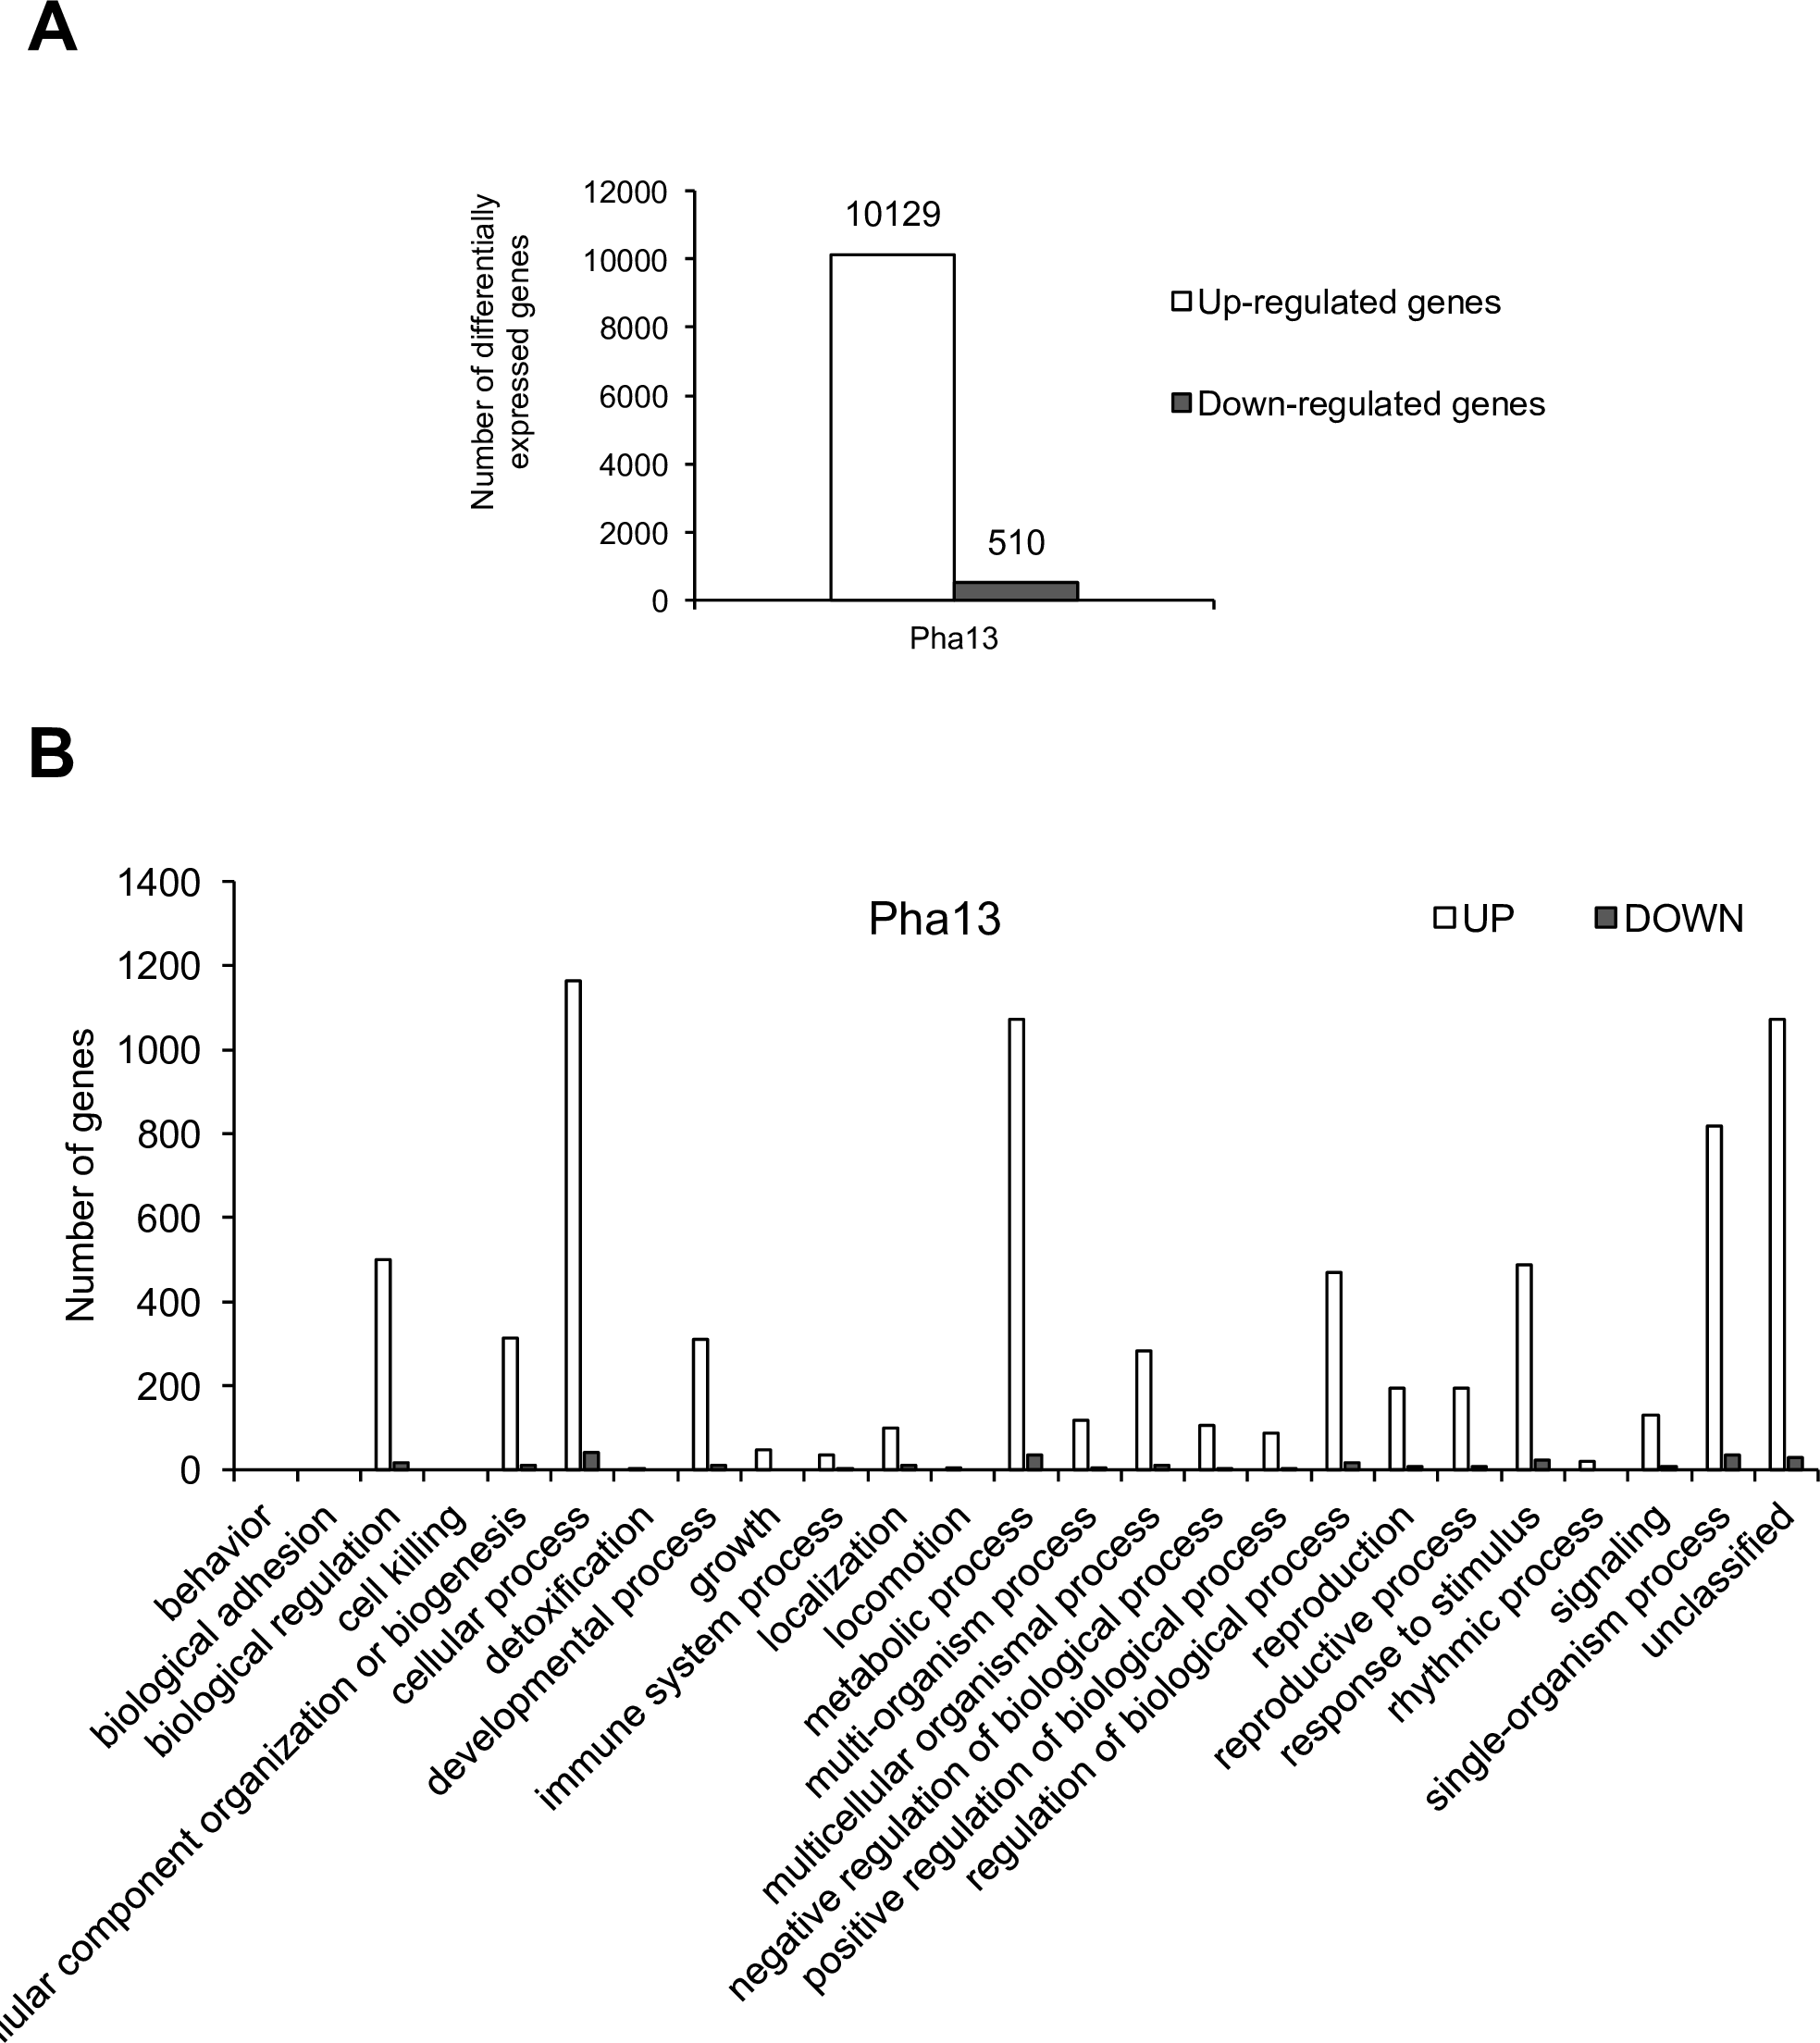

Supplement: Supplementary file 1 [file 1 › ppat.1007288.s005.tif]

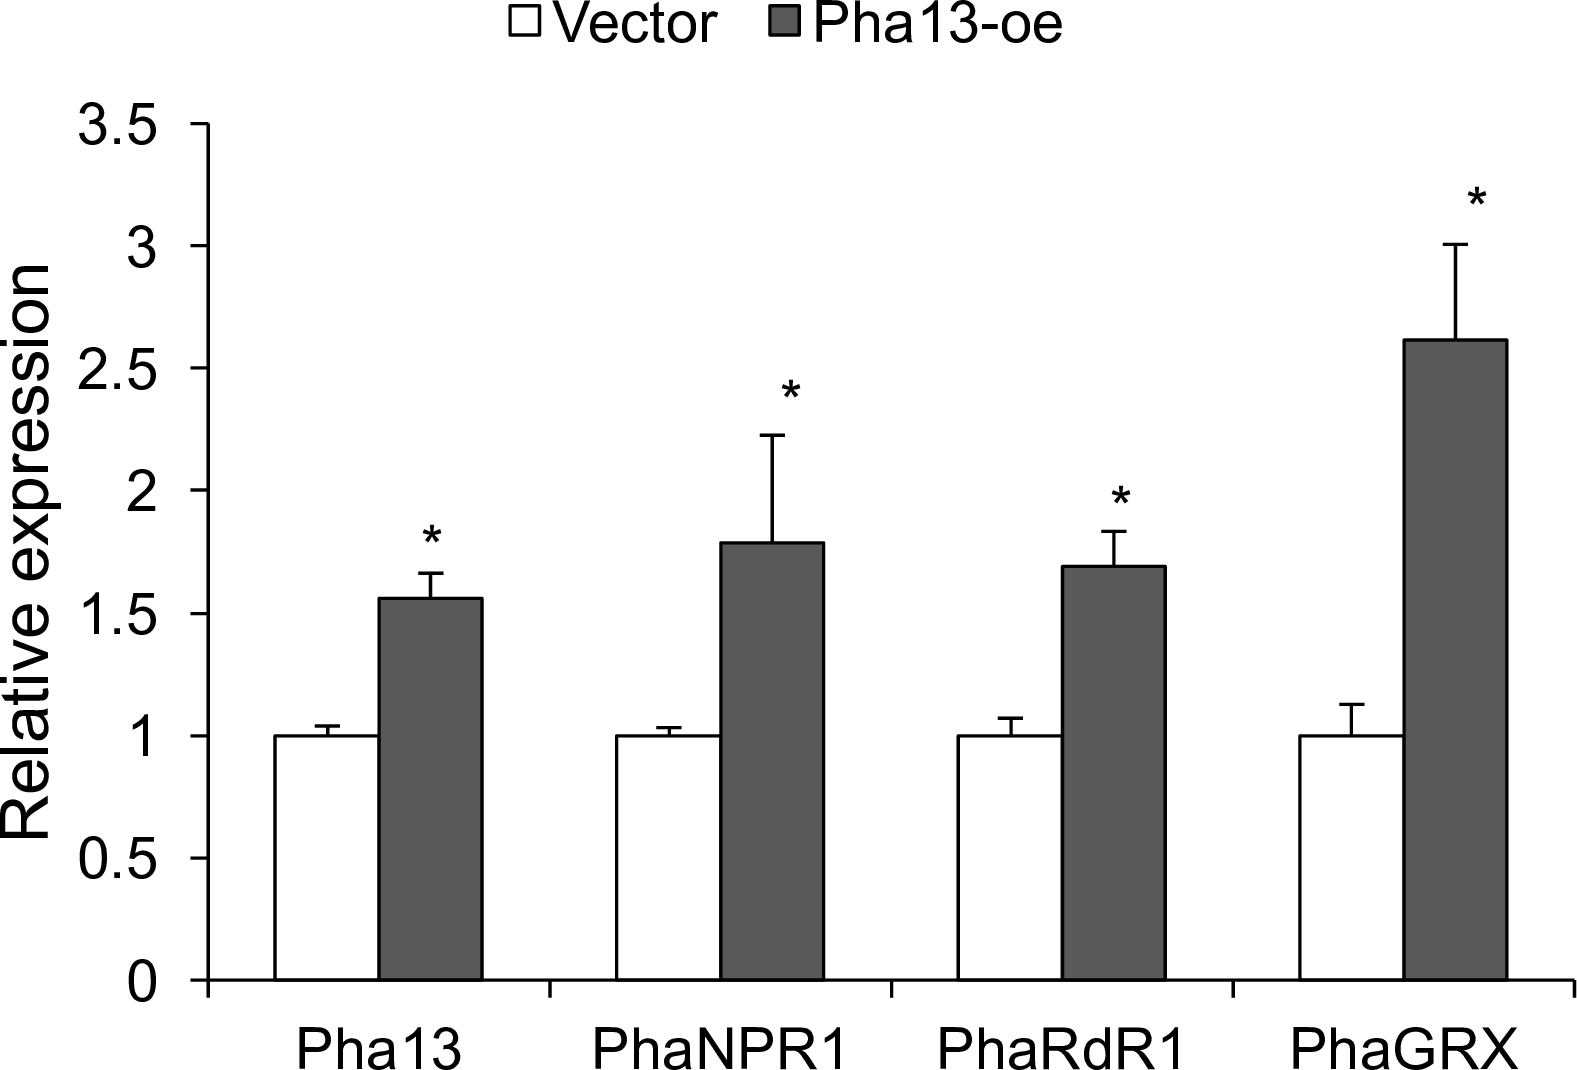

Supplement: Supplementary file 1 [file 1 › ppat.1007288.s006.tif]

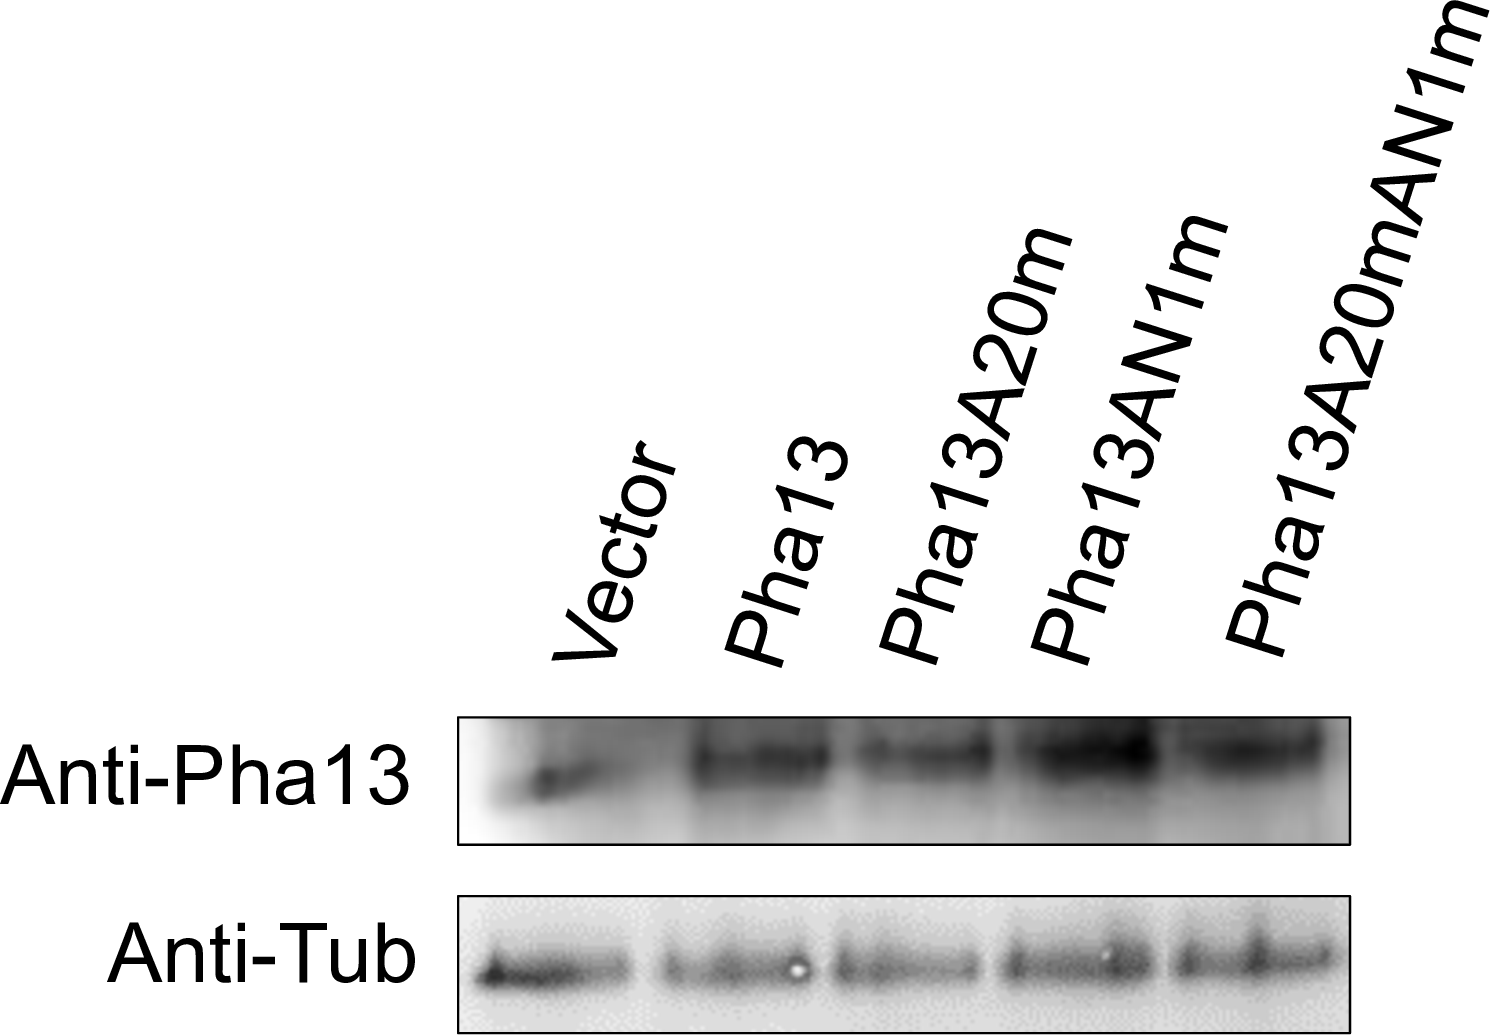

Supplement: Supplementary file 1 [file 1 › ppat.1007288.s007.tif]

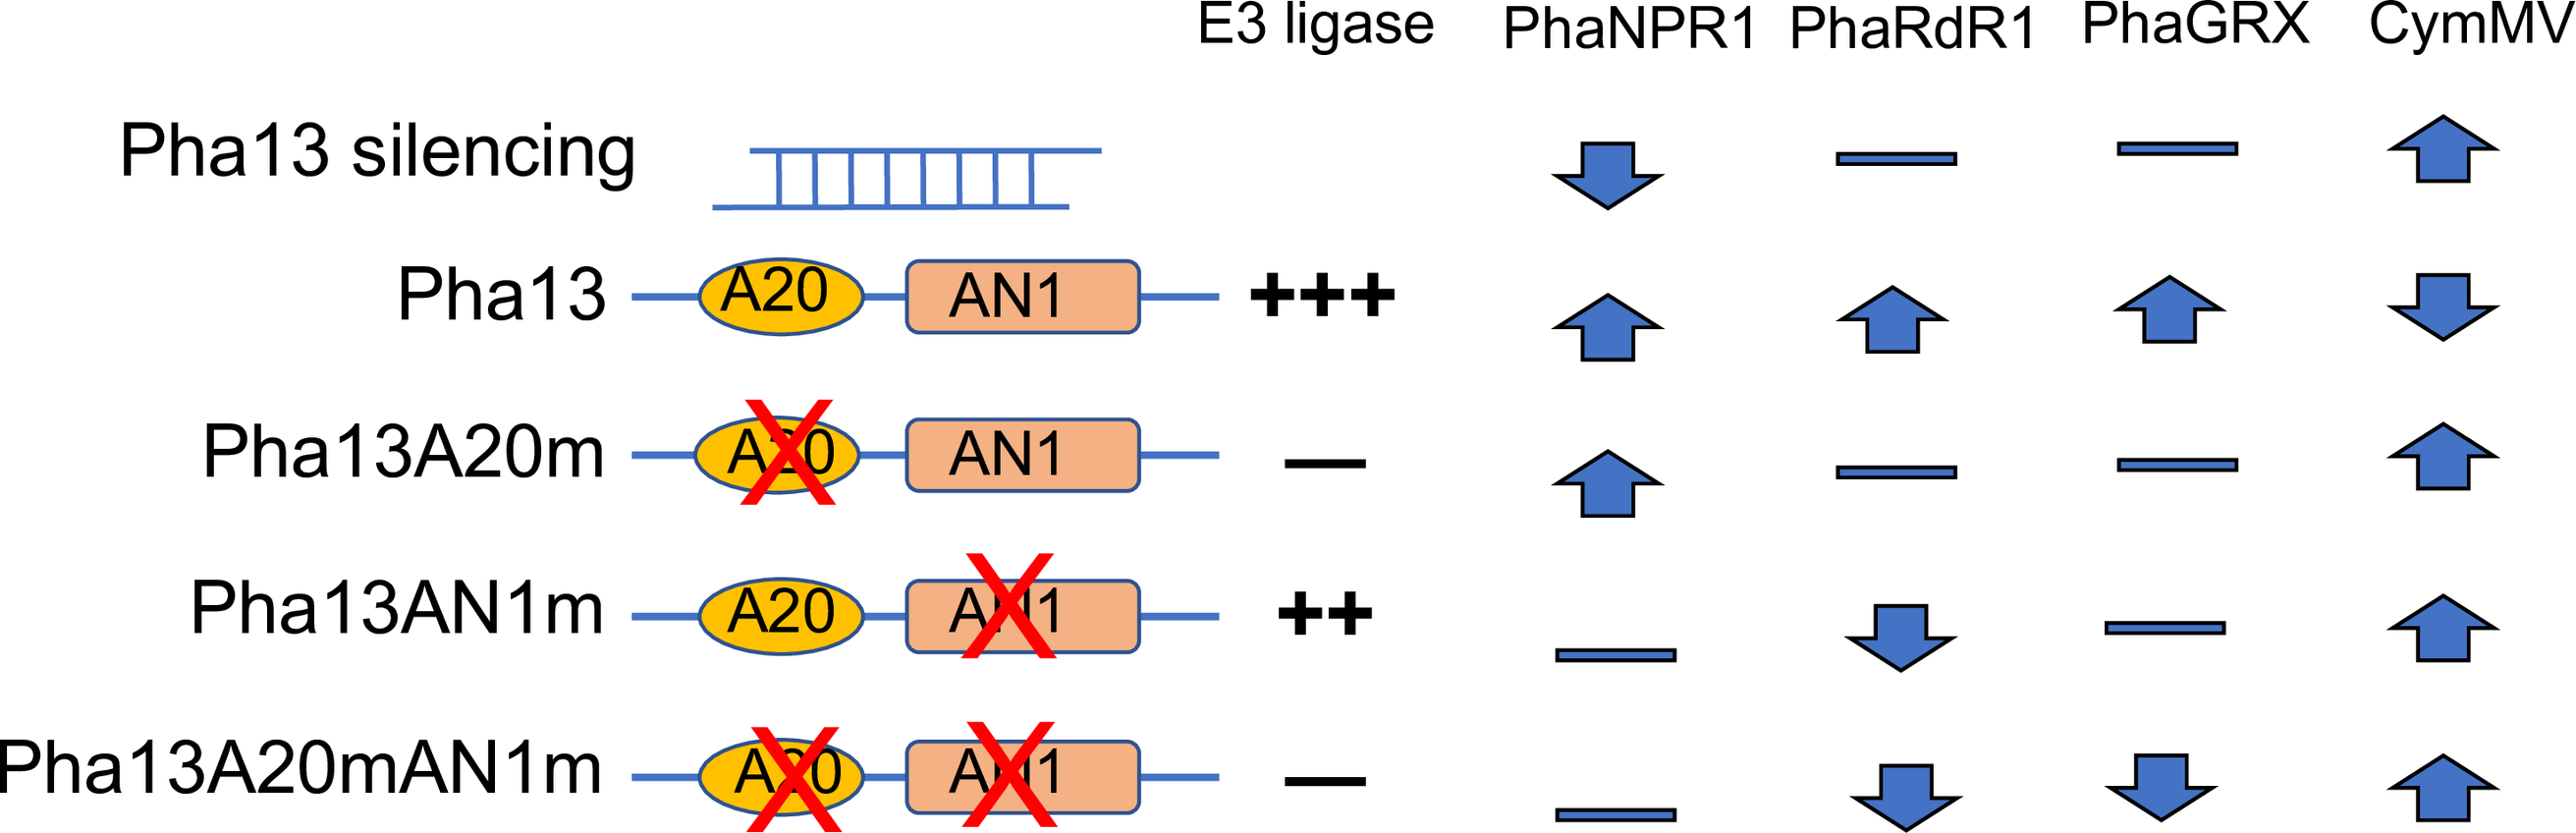

Supplement: Supplementary file 1 [file 1 › ppat.1007288.s008.tif]

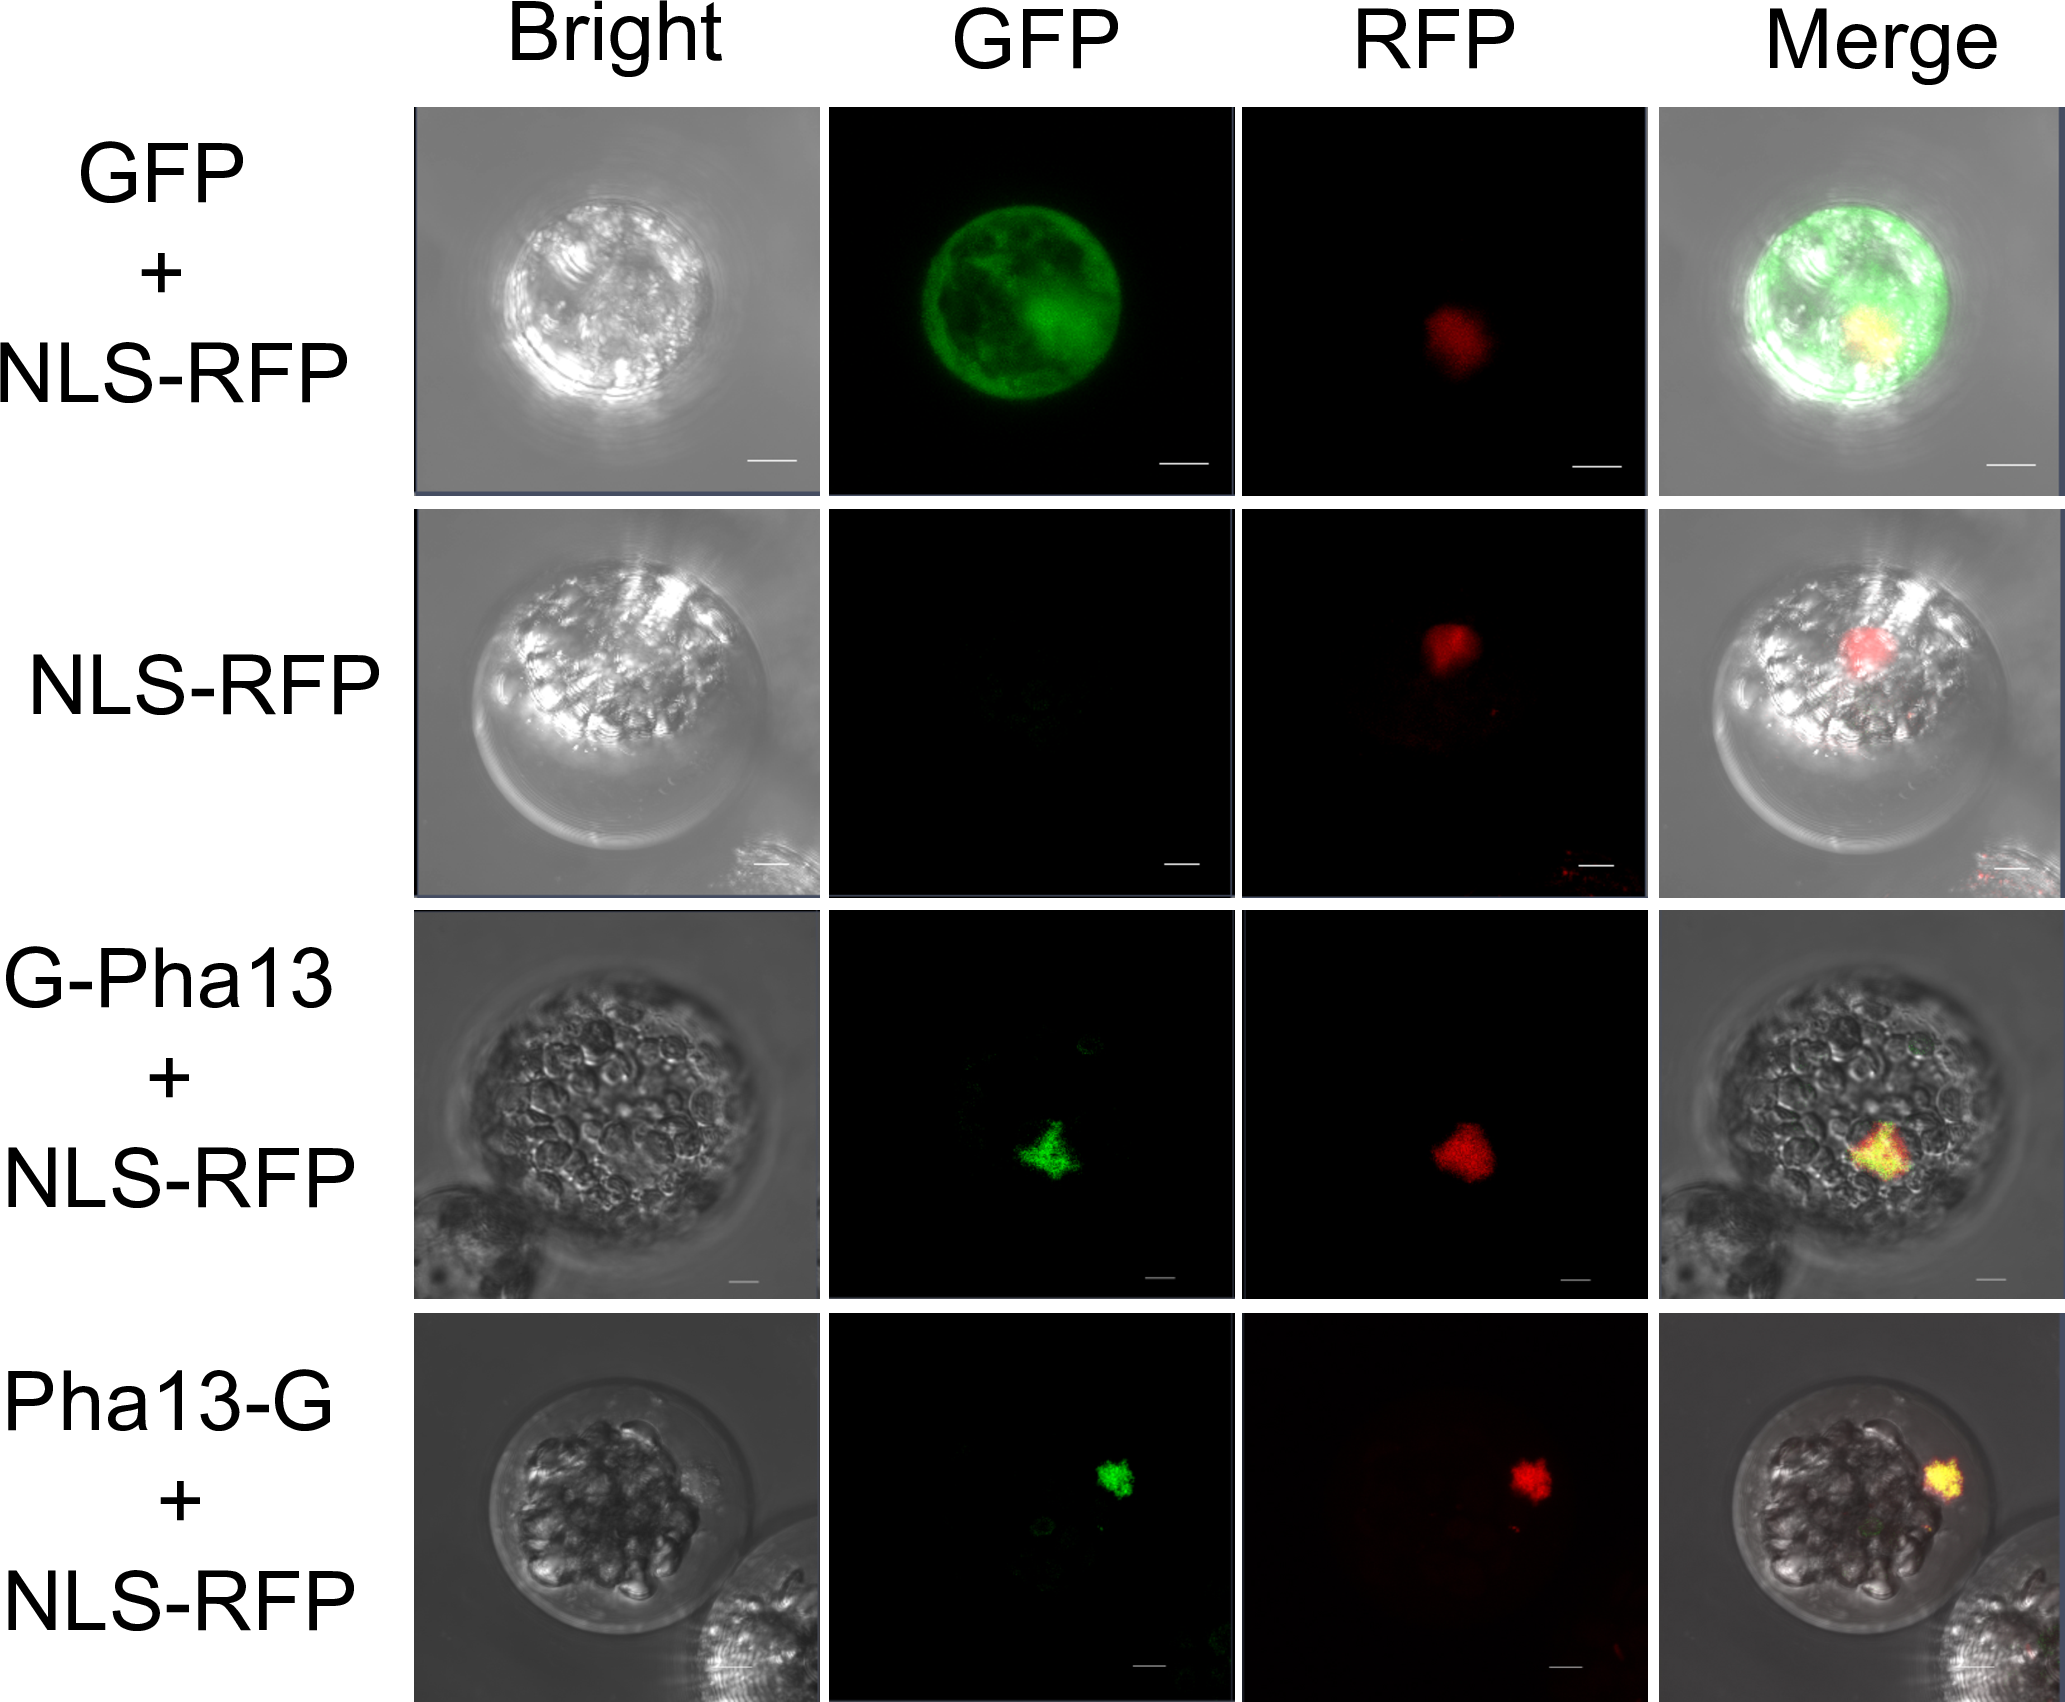

Supplement: Supplementary file 1 [file 1 › ppat.1007288.s009.tif]

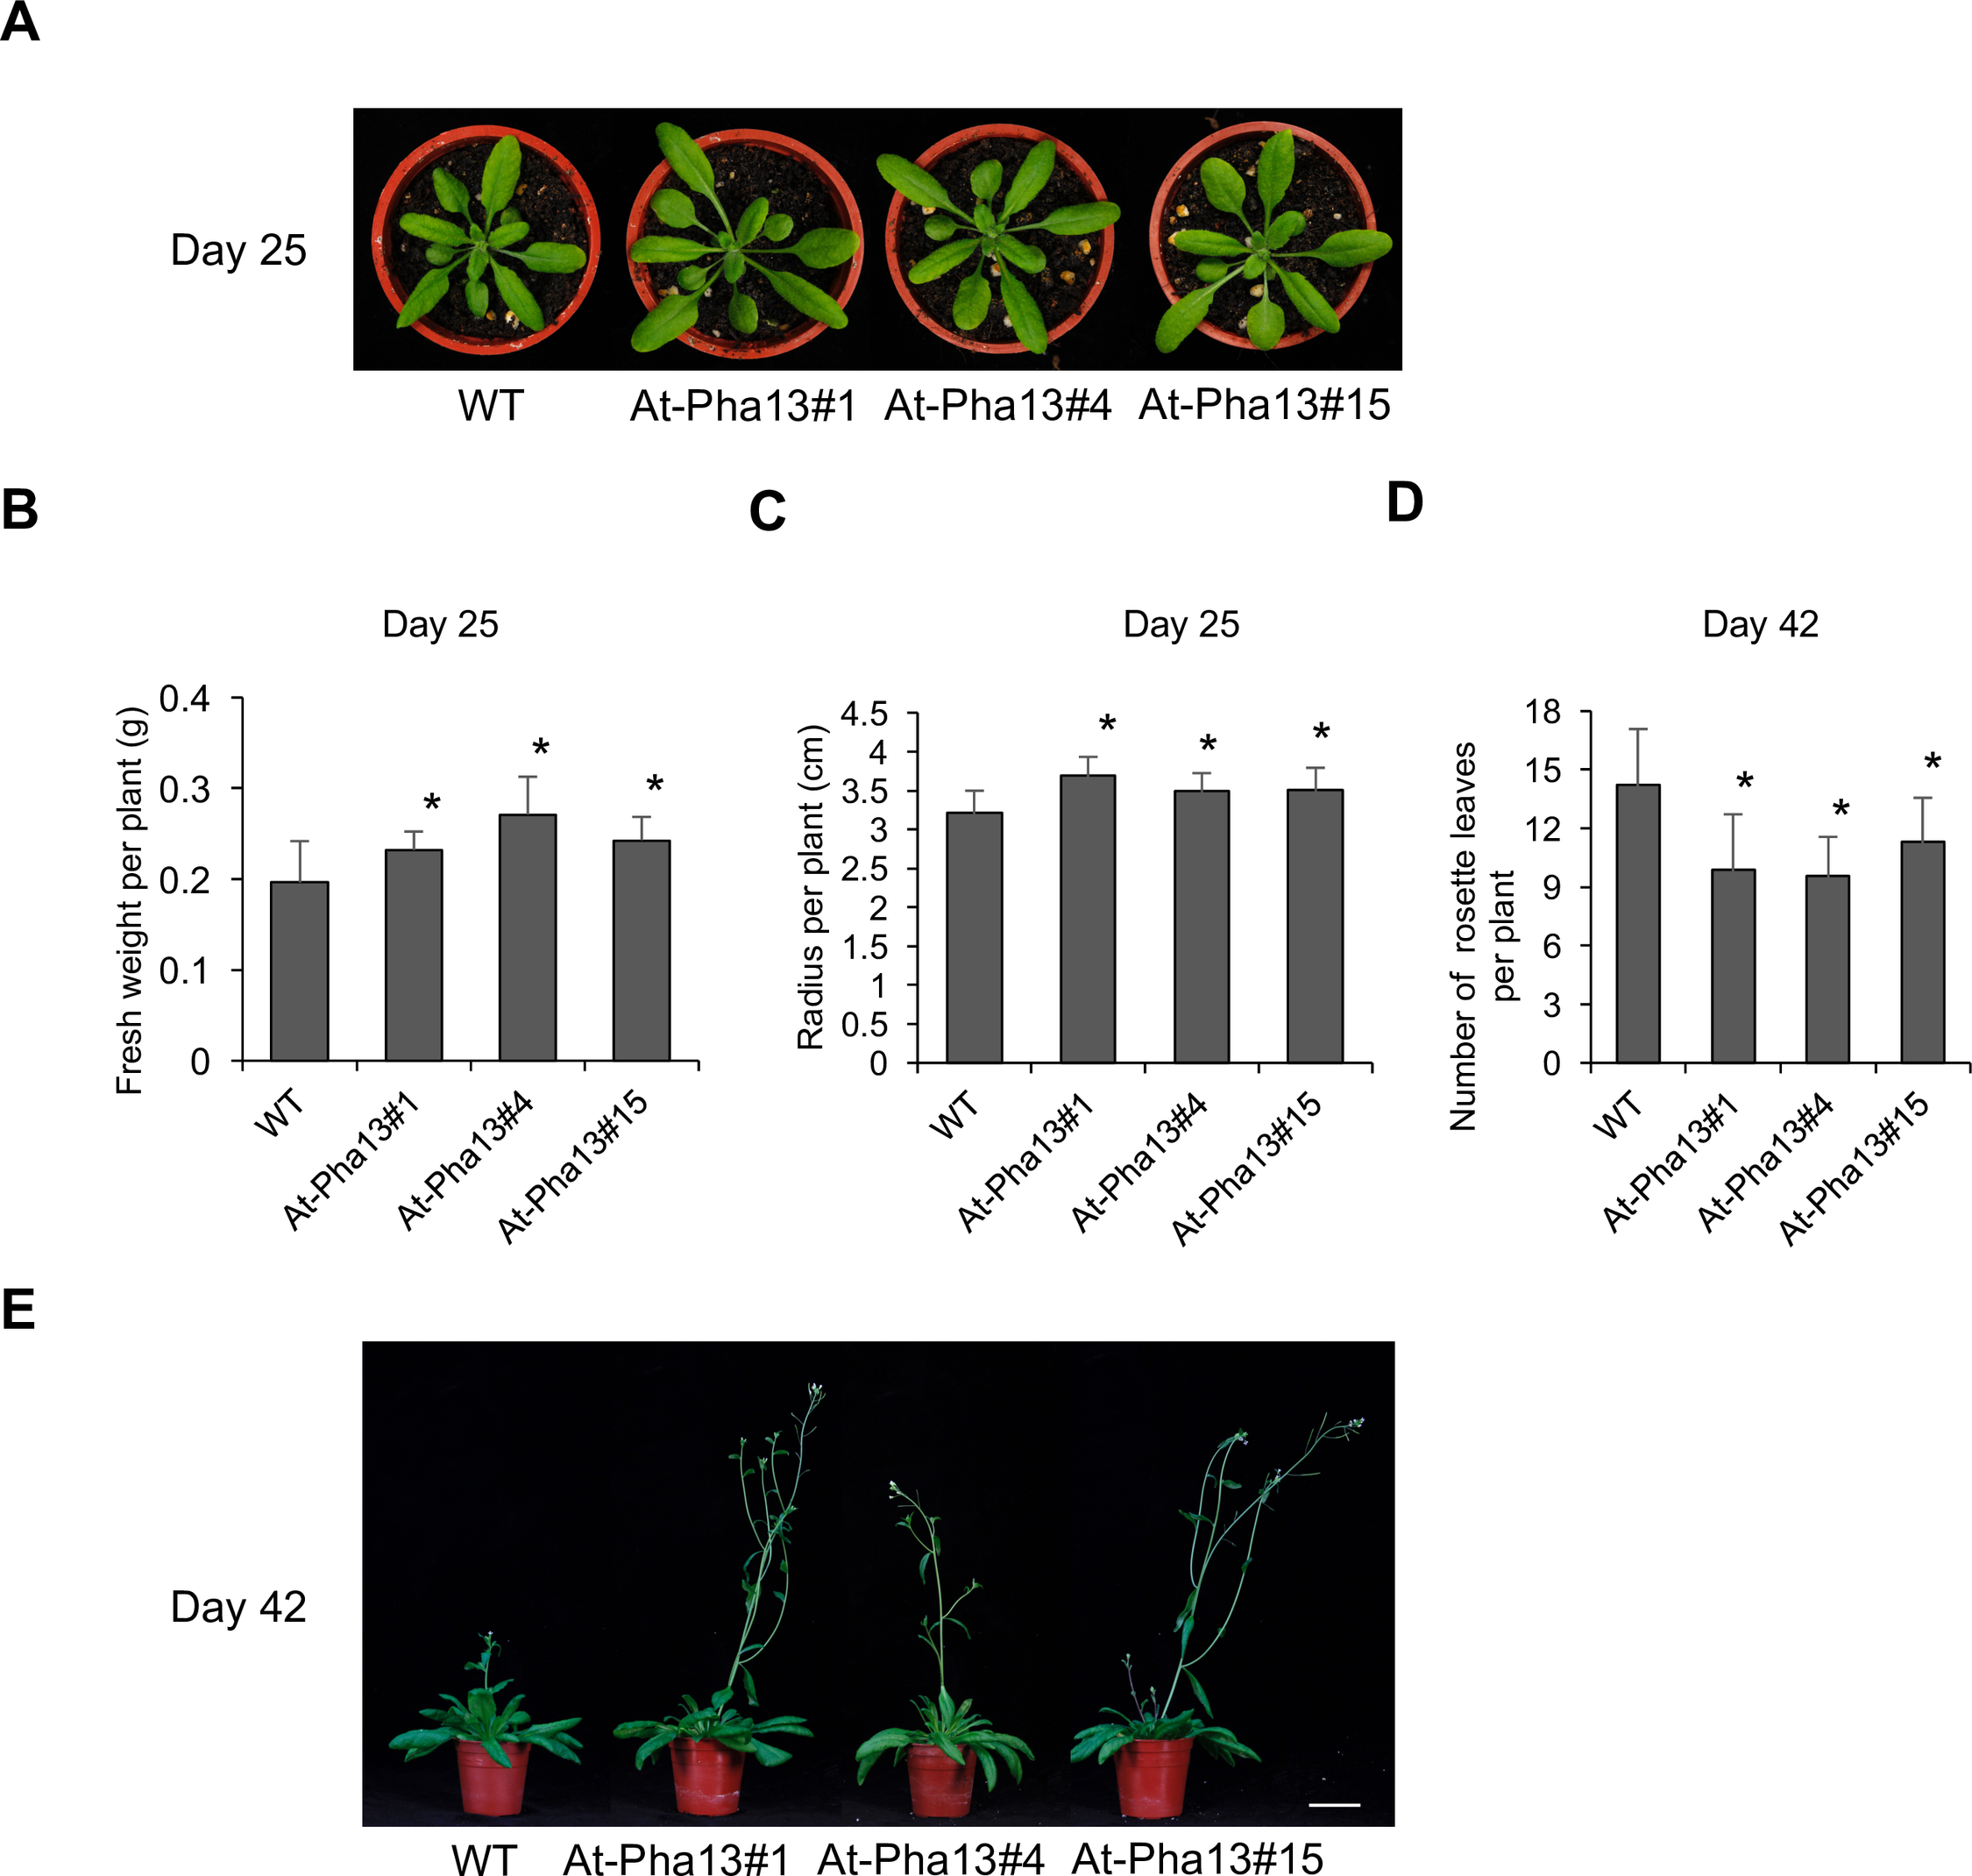

Supplement: Supplementary file 1 [file 1 › ppat.1007288.s010.tif]

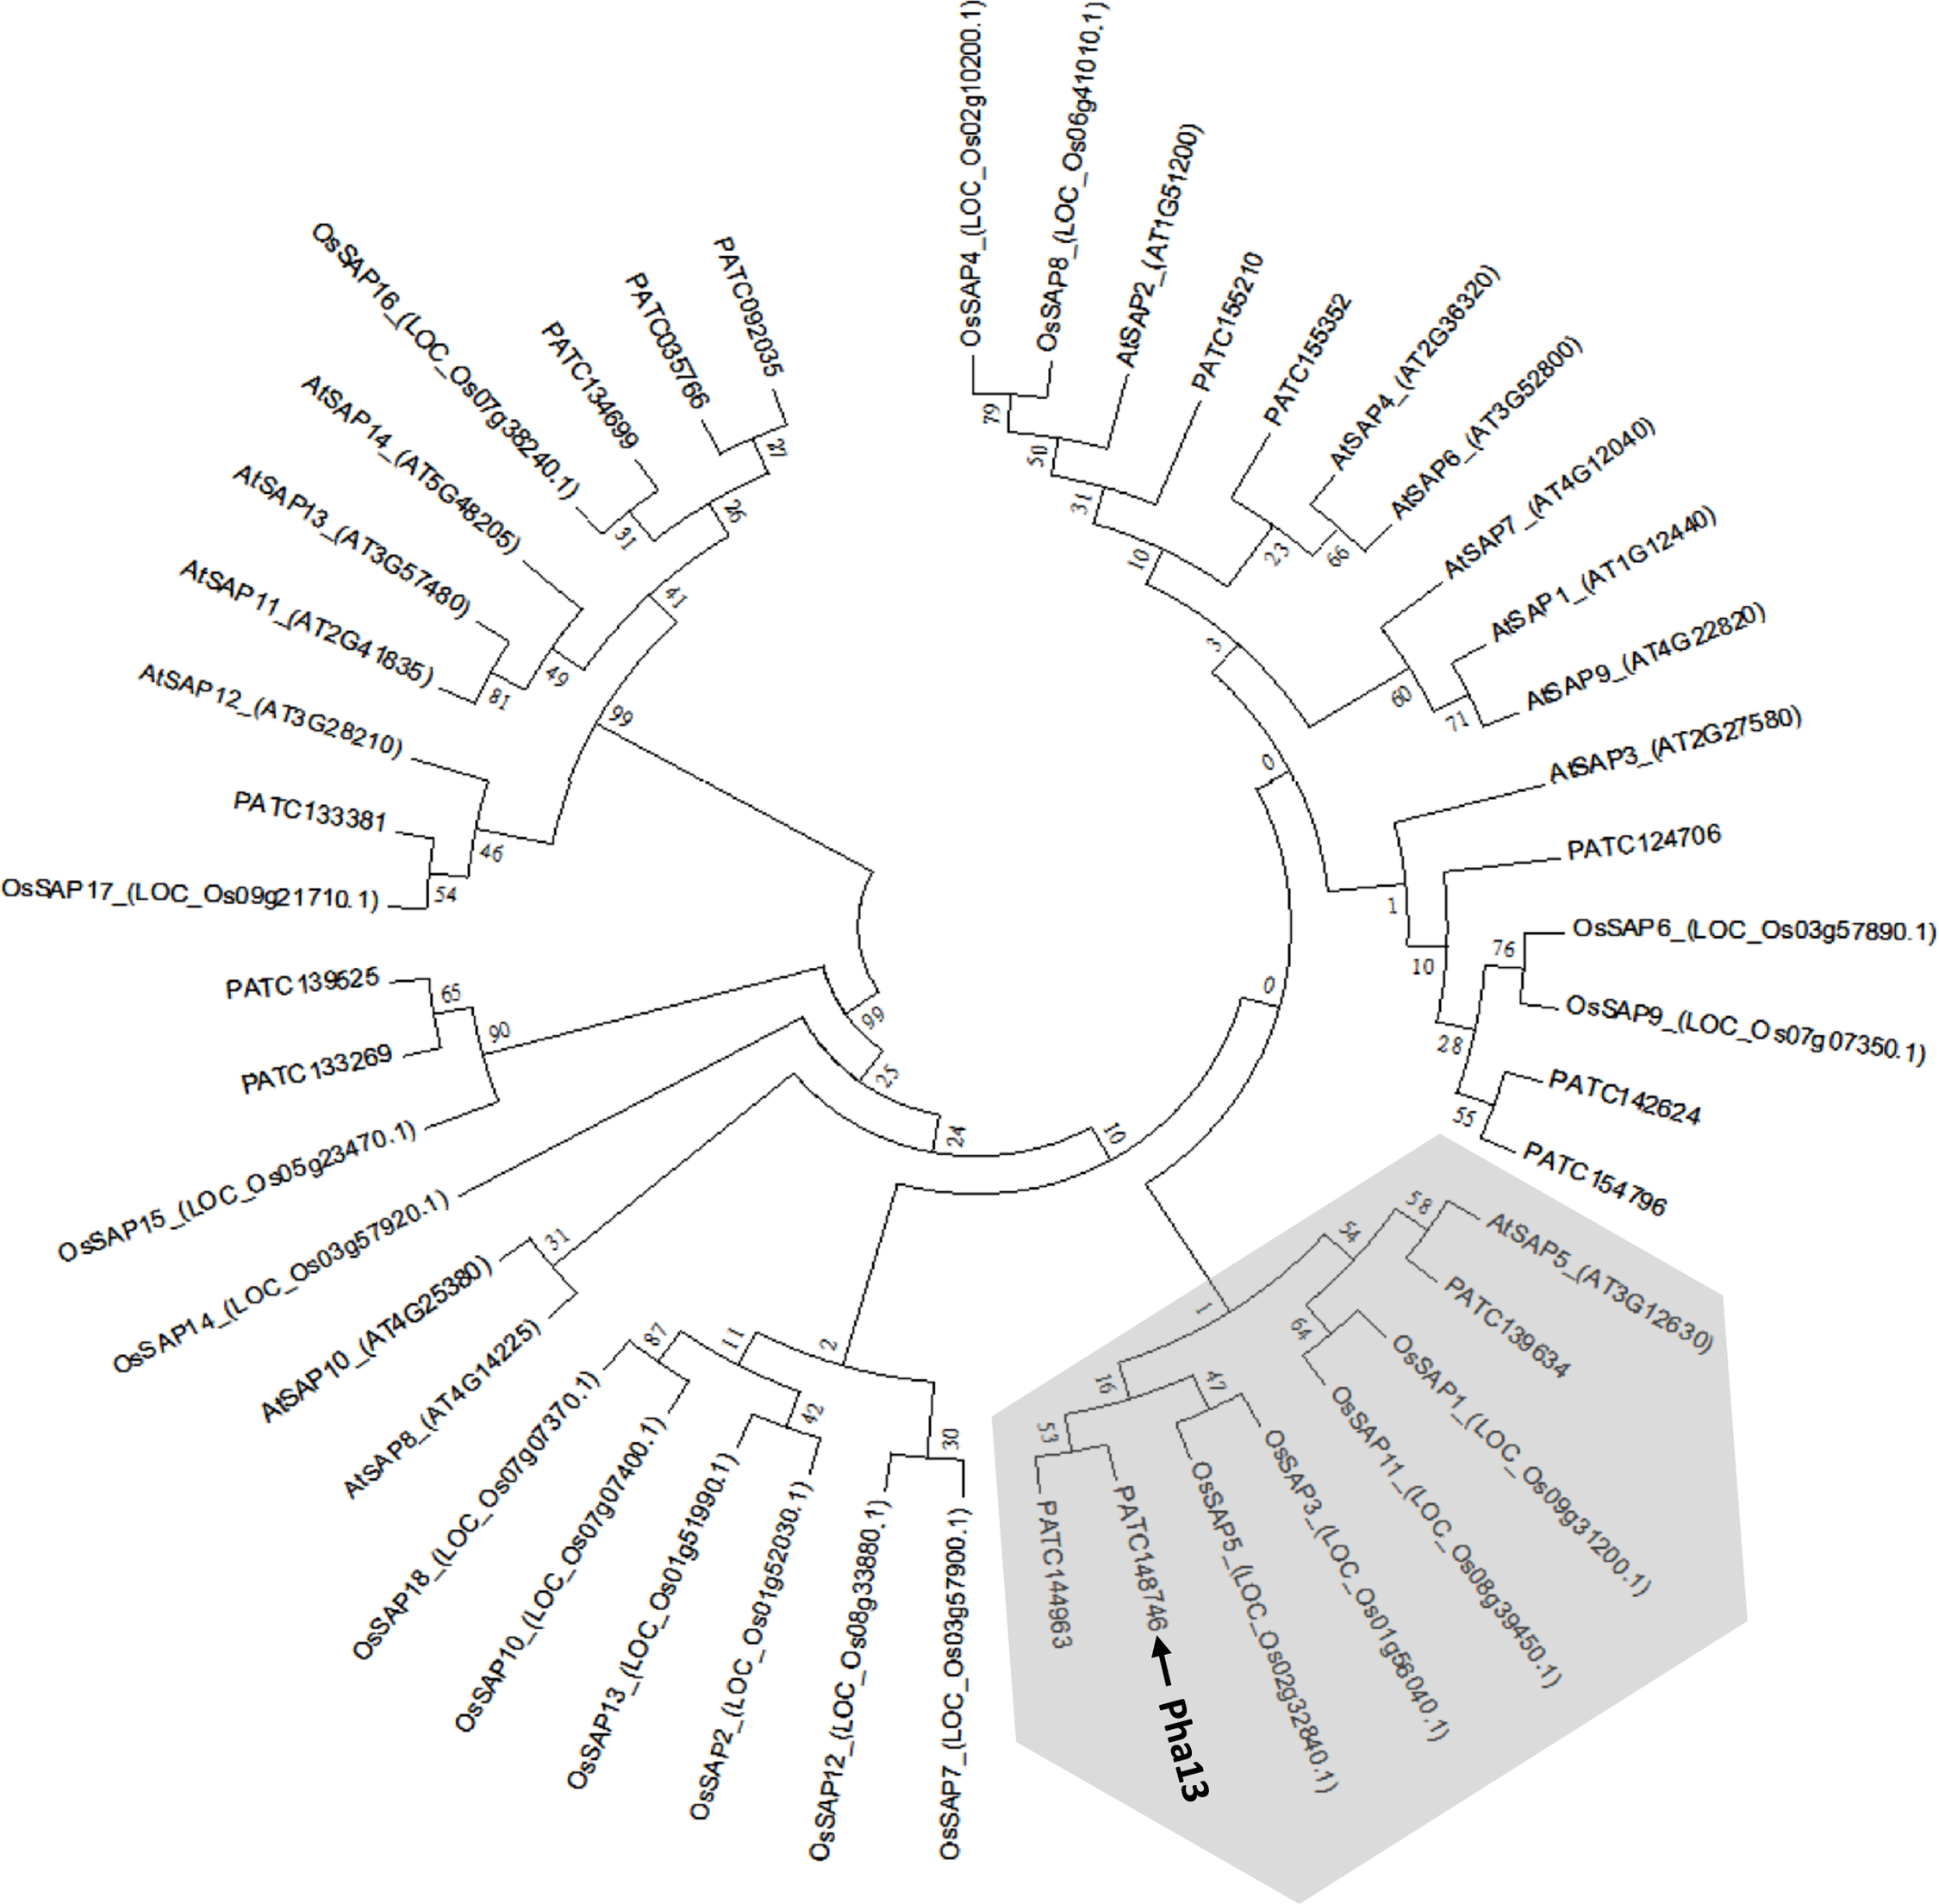

Supplement: Supplementary file 1 [file 1 › ppat.1007288.s011.tif]

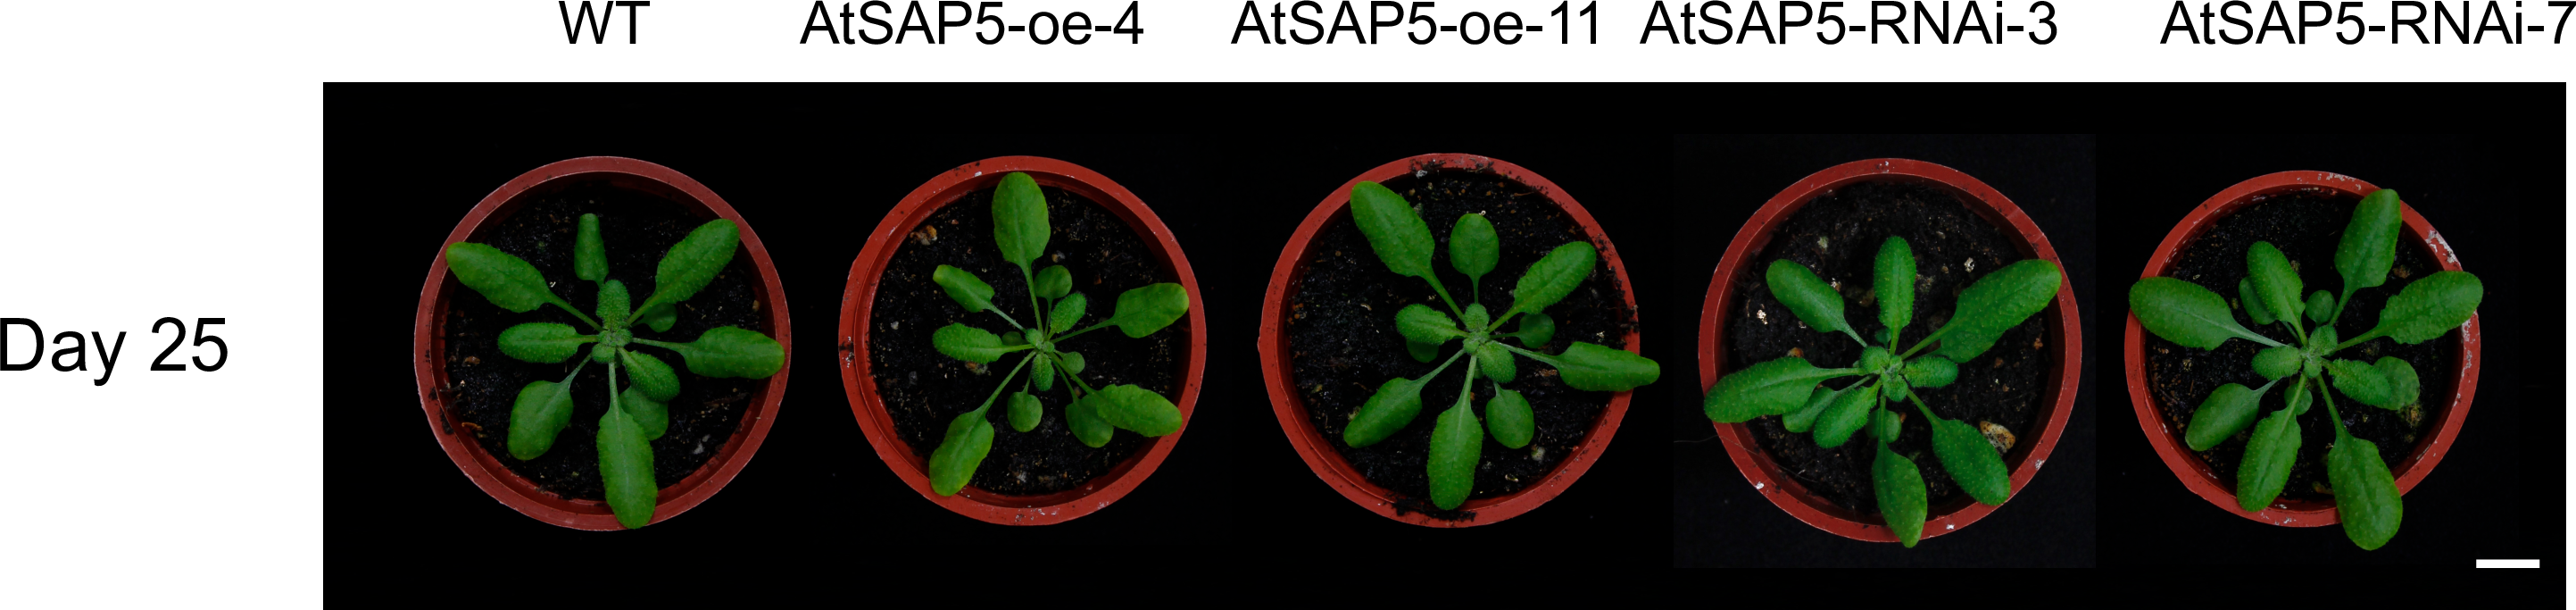

Supplement: Supplementary file 1 [file 1 › ppat.1007288.s012.tif]

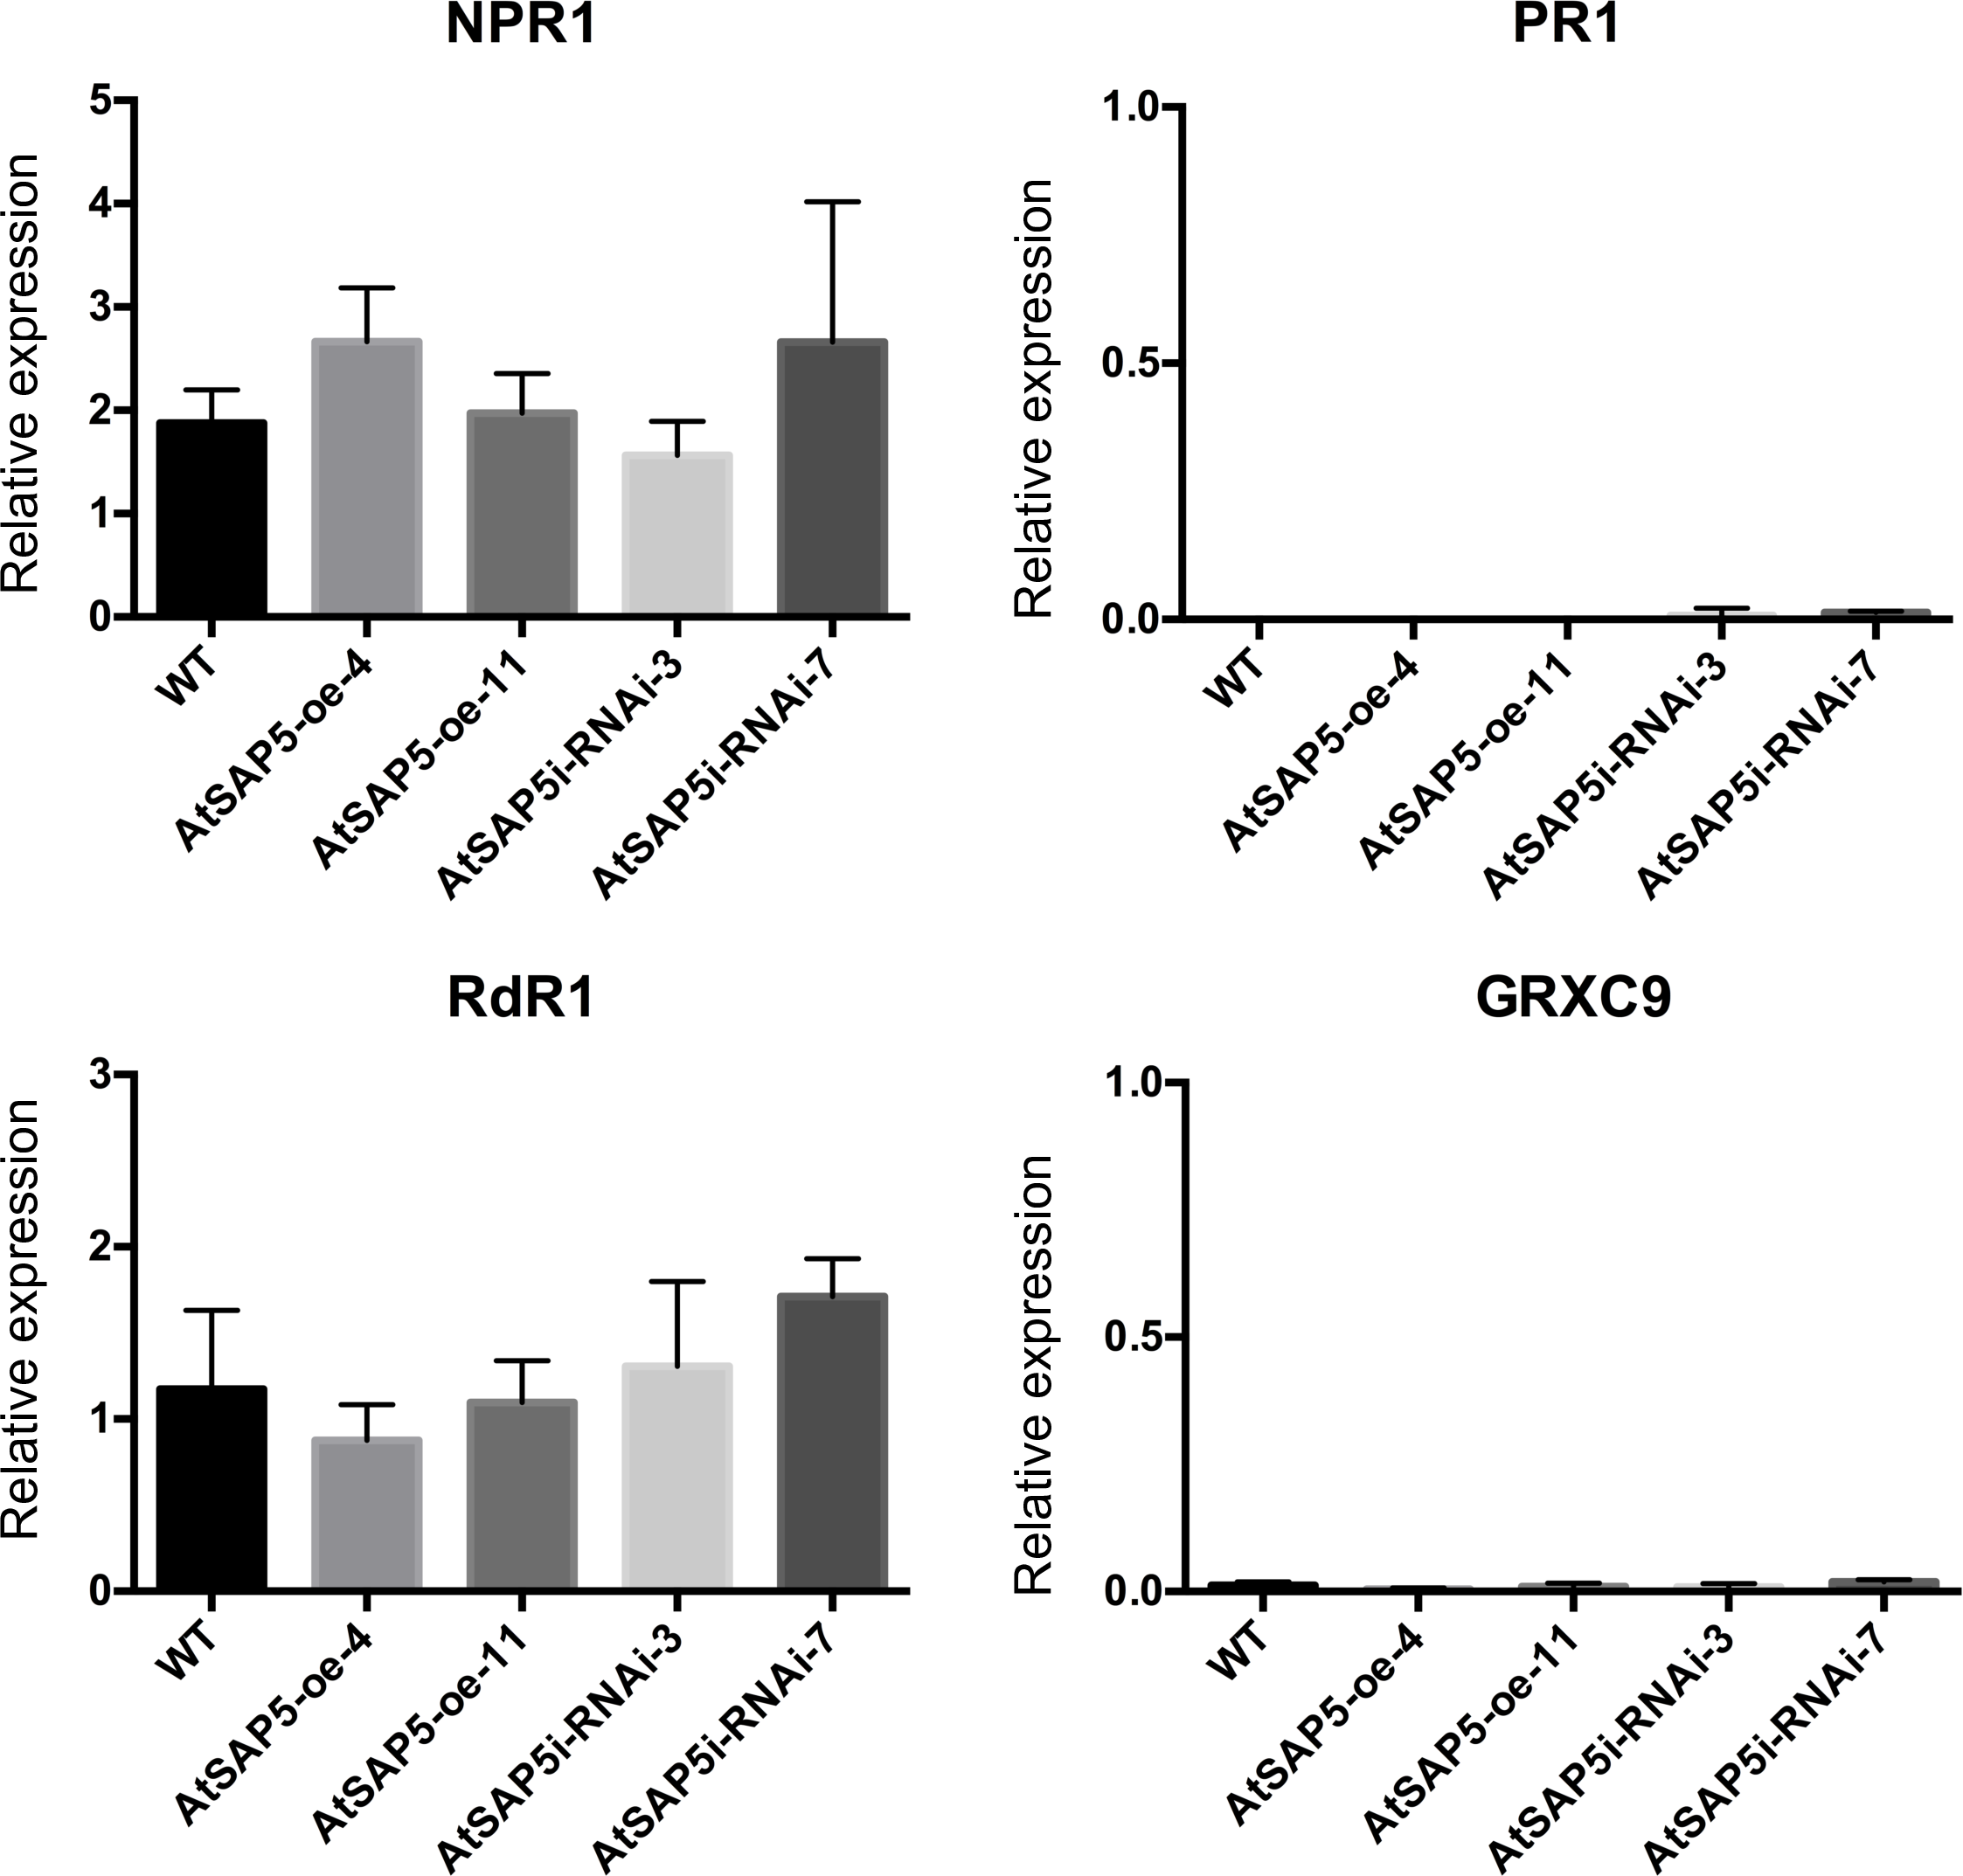

Supplement: Supplementary file 1 [file 1 › ppat.1007288.s013.tif]
